# 1 Resting brain fluctuations are intrinsically coupled to 2 visual response dynamics

3

## 4 **Authors:**

5 Michaël E. Belloy<sup>1,2</sup>, Jacob Billings<sup>3</sup>, Anzar Abbas<sup>3</sup>, Amrit Kashyap<sup>2</sup>, Wen-ju Pan<sup>2</sup>, Rukun Hinz<sup>1</sup>, Verdi Vanreusel<sup>1</sup>, Johan Van  
6 Audekerke<sup>1</sup>, Annemie Van der Linden<sup>1</sup>, Shella D. Keilholz<sup>4</sup>, Marleen Verhoye<sup>1</sup>, Georgios A. Keliris<sup>1</sup>.

7

## 8 **Authors' affiliations:**

9 <sup>1</sup> Bio-Imaging Lab, Department of Pharmaceutical, Veterinary and Biomedical Sciences, University of Antwerp, Universiteitsplein  
10 1, 2610 Wilrijk, Antwerp, Belgium.

11 <sup>2</sup> Department of Biomedical Engineering, Emory University and Georgia Institute of Technology, 1760 Haygood Dr NE, Atlanta, GA,  
12 30322, USA

13 <sup>3</sup> Department of Neuroscience, Emory University, 1760 Haygood Dr NE, Atlanta, GA, 30322, USA.

14

## 15 **Corresponding authors:**

16 [Michael.belloy@hotmail.be](mailto:Michael.belloy@hotmail.be)

17 [Georgios.keliris@uantwerpen.be](mailto:Georgios.keliris@uantwerpen.be)

18 [Shella.keilholz@bme.gatech.edu](mailto:Shella.keilholz@bme.gatech.edu)

19

20

21

22

23

24

25

26

27 **Abstract**

28  
29 How do intrinsic brain dynamics interact with processing of external sensory stimuli? We sought  
30 new insights using functional (f)MRI to track spatiotemporal activity patterns at the whole brain  
31 level in lightly anesthetized mice, during both resting conditions and visual stimulation trials. Our  
32 results provide evidence that quasiperiodic patterns (QPPs) govern mouse resting brain dynamics.  
33 QPPs captured the temporal alignment of global brain fluctuations, anti-correlation of the Default  
34 Mode (DMN)- and Task Positive (TPN)-like networks, and activity in neuromodulatory nuclei of  
35 the reticular formation. While visual stimulation could trigger a transient spatiotemporal pattern  
36 highly similar to intrinsic QPPs, global signal fluctuations and QPPs during rest periods could  
37 explain variance in the following visual responses. QPPs and the global signal thus appeared to  
38 capture a common arousal-related brain-state fluctuation, orchestrated through  
39 neuromodulation. Our findings provide new frontiers to understand the neural processes that  
40 shape functional brain states and modulate sensory input processing.

41

42

43

44

45

46

47

48

49

50

## 51 Introduction

52 Resting state fMRI (rsfMRI) and task-evoked fMRI are powerful complementary techniques to  
53 study brain function (Bandettini, 2012; Fox and Raichle, 2007). The first investigates the  
54 intrinsically highly active nature of the brain, while the second studies the brain's reflexive  
55 properties and less so considers the 'background' intrinsic fluctuations that are averaged out  
56 across trials (Raichle, 2010). Recent studies support the view that intrinsic BOLD fluctuations  
57 across individual trials affect sensory responses and behavioral performance (Boly et al., 2007;  
58 Fox et al., 2007, 2006; He, 2013; Sadaghiani et al., 2009; Thompson et al., 2013). Yet, it remains  
59 unclear which specific regional or brain-wide neural mechanisms underlie this interaction.

60 Answers may come from emerging tools in the field of time-resolved rsfMRI, which attempts  
61 to identify the dynamic interaction of brain networks during the resting state (Allen et al., 2014;  
62 Deco et al., 2011; Keilholz, 2014). Brain 'states' or cognitive fluctuations may be identified and  
63 their role in task performance evaluated (Gonzalez-Castillo et al., 2015; Keilholz et al., 2017; Kucyi  
64 et al., 2018). Changes in vigilance or attention may also be identified and appear difficult to  
65 dissociate from cognitive brain states (Allen et al., 2018; Chang et al., 2016; Hinz et al., 2019;  
66 Laumann et al., 2017; Shine et al., 2016; Tagliazucchi and Laufs, 2014; Wang et al., 2016).

67 One recurring finding is that whole-brain global BOLD signal dynamics contain an arousal  
68 component (Horovitz et al., 2008; Liu et al., 2017; Sämann et al., 2011; Wong et al., 2016, 2013,  
69 2012; Yeo et al., 2015). A significant fraction of the global BOLD signal has been correlated with a  
70 global neuronal signal, which further appeared to be driven by cholinergic neuromodulatory  
71 actuators, and was coupled to arousal-related fluctuations in brain state (Chang et al., 2016; Liu  
72 et al., 2018; Schölvinck et al., 2010; Turchi et al., 2018; Wen and Liu, 2016). Despite these insights,  
73 there is currently a lack of well-defined brain state dynamics and associated properties.

74 New insights for further understanding the interplay of these processes across different brain  
75 areas and temporal lengths may come from recently developed techniques such as identifying  
76 and studying quasi-periodic patterns (QPPs) of brain activity. QPPs, first introduced by the Keilholz  
77 group in 2009 (Majeed et al., 2009), refer to infraslow (0.01-0.2Hz) spatiotemporal patterns in the  
78 BOLD signal that recur quasi-periodically throughout the duration of a resting state scan.  
79 Interestingly, across multiple species, QPPs display prominent anti-correlation between the

80 Default Mode network (DMN) and Task Positive network (TPN) (A. Abbas et al., 2016; Belloy et  
81 al., 2018a; Majeed et al., 2011; Yousefi et al., 2018). The DMN and TPN are thought to regulate  
82 competing cognitive processes related to processing of internal and external input (Fransson,  
83 2006; Greicius et al., 2003; Northoff et al., 2010). Fluctuations in their activity reflects modulations  
84 in attention, affects sensory responses, and can explain some behavioral variability (Abbas et al.,  
85 2019; Esterman et al., 2013; Helps et al., 2009; Lakatos et al., 2016; Sadaghiani et al., 2009;  
86 Weissman et al., 2006). Specifically, time-varying DMN-TPN anti-correlations have been  
87 correlated with arousal fluctuations and lapses in behavioral performance (A Abbas et al., 2016;  
88 Lynn et al., 2015; Thompson et al., 2013; Wang et al., 2016). Substantial evidence thus suggests  
89 that QPP dynamics reflect fluctuations in brain state and may modulate task-evoked sensory  
90 responses, yet this question has not been formally investigated.

91 These observations listed above suggest a functional overlap between global neural brain  
92 dynamics and QPPs, a link that has recently been supported through their spatiotemporal overlap  
93 (Belloy et al., 2018a; Nalci et al., 2017; Yousefi et al., 2018). This relationship is, however, not  
94 simple. On one hand, the 'global' signal may variably be composed by the activity of large resting  
95 state networks rather than brain-wide activations (Billings and Keilholz, 2018), while on the other  
96 hand, QPPs do not fully make up the global signal (Belloy et al., 2018b; Yousefi et al., 2018). The  
97 intricate relationship between the global signal and DMN-TPN anti-correlation has a longstanding  
98 history in the fMRI community (Murphy and Fox, 2016), but their mechanistic relationship  
99 remains to be identified.

100 In this study, we hypothesized that the quasi-periodic anti-correlations between the mouse  
101 DMN- and TPN-like networks, identified under the form of QPPs (Belloy et al., 2018a), may reflect  
102 ongoing brain state fluctuations linked to arousal- or salience-related processes. Further, we  
103 speculated that if this relationship between QPPs and brain state fluctuations exists, then this  
104 would establish an intricate and measurable link between QPPs and sensory response variance.  
105 To this end, we performed fMRI experiments in healthy C57BL6/J mice under rest and sensory  
106 visual stimulation conditions with two main goals: **1)** Determine how mouse resting state QPPs  
107 relate to global brain fluctuations, indicated to reflect arousal dynamics in the literature, and **2)**  
108 Determine if ongoing QPPs either affect, or are modulated by, visual sensory processing.

## 109 **Results**

110 Experiments were performed in mice (N=24) that were further separated in two equally  
111 populated groups (N=12) that followed equivalent experimental procedures, resting state and  
112 visual fMRI, albeit with slightly different order to control for potential time and anesthesia effects  
113 **(Supplementary table S1)**. Overall, scan mean frame-wise displacement was negligible across all  
114 scans [ $0.38 \pm 0.04$  mm (mean + STD)] **(Supplementary table S2)**. Resting state scans from multiple  
115 sessions and time points were used to determine large-scale resting state networks (RSNs), by  
116 means of ICA **(Supplementary Figure S1)**. These RSNs displayed plausible physiological networks,  
117 supporting data quality (cfr. **Supplementary Text**). There were no significant differences of RSNs  
118 between animal groups **(Supplementary table S3)**, nor significant differences of visual activation  
119 maps between groups, supporting data pooling for subsequent analyses.

### 120 **Quasi-periodicity during resting state**

121 Using methods and analysis strategies that we previously established [cfr. (Belloy et al., 2018a,  
122 2018b) and M&M], we consistently identified three QPPs of interest in the data **(Figure 1A)**: QPP1,  
123 a short 3s pattern that displayed a transient wide-spread anti-correlation between DMN-  
124 like/Sensory networks and the lateral cortical network (LCN; a proposed mouse analogue of the  
125 TPN; cfr. discussion) **(Video 1)**; QPP2, a 9s pattern that initially is similar to QPP1 but continues  
126 and reverses pattern in later frames **(Video 2)**; and QPP3, a 9s pattern cycling between wide-  
127 spread activation and de-activation **(Video 3)**. Except for the LCN, the three QPPs largely involved  
128 the same brain areas. All three QPPs displayed a high degree of temporal co-linearity **(Figure 1A-**  
129 **B)**, indicating a potential shared underlying process. This was further exemplified by the common  
130 quasi-periodicity in their power spectra [see deviations from the 1/f power law; **(Supplementary**  
131 **Figure S2)**]. To further estimate the time-relationship of these three QPPs, phase-phase plots  
132 were constructed for all QPP pairs **(Figure 1C-E)**. All QPPs displayed prominent phase-phase  
133 coupling, and this was only slightly reduced between QPP2 and QPP3. Notably, for each of the  
134 observed QPPs, an opposite phase variant was also observed with consistent temporal  
135 characteristics **(Supplementary Figure S3)**. These were not further considered given their  
136 equivalence (nearly inverted time series) to the primary described QPPs.

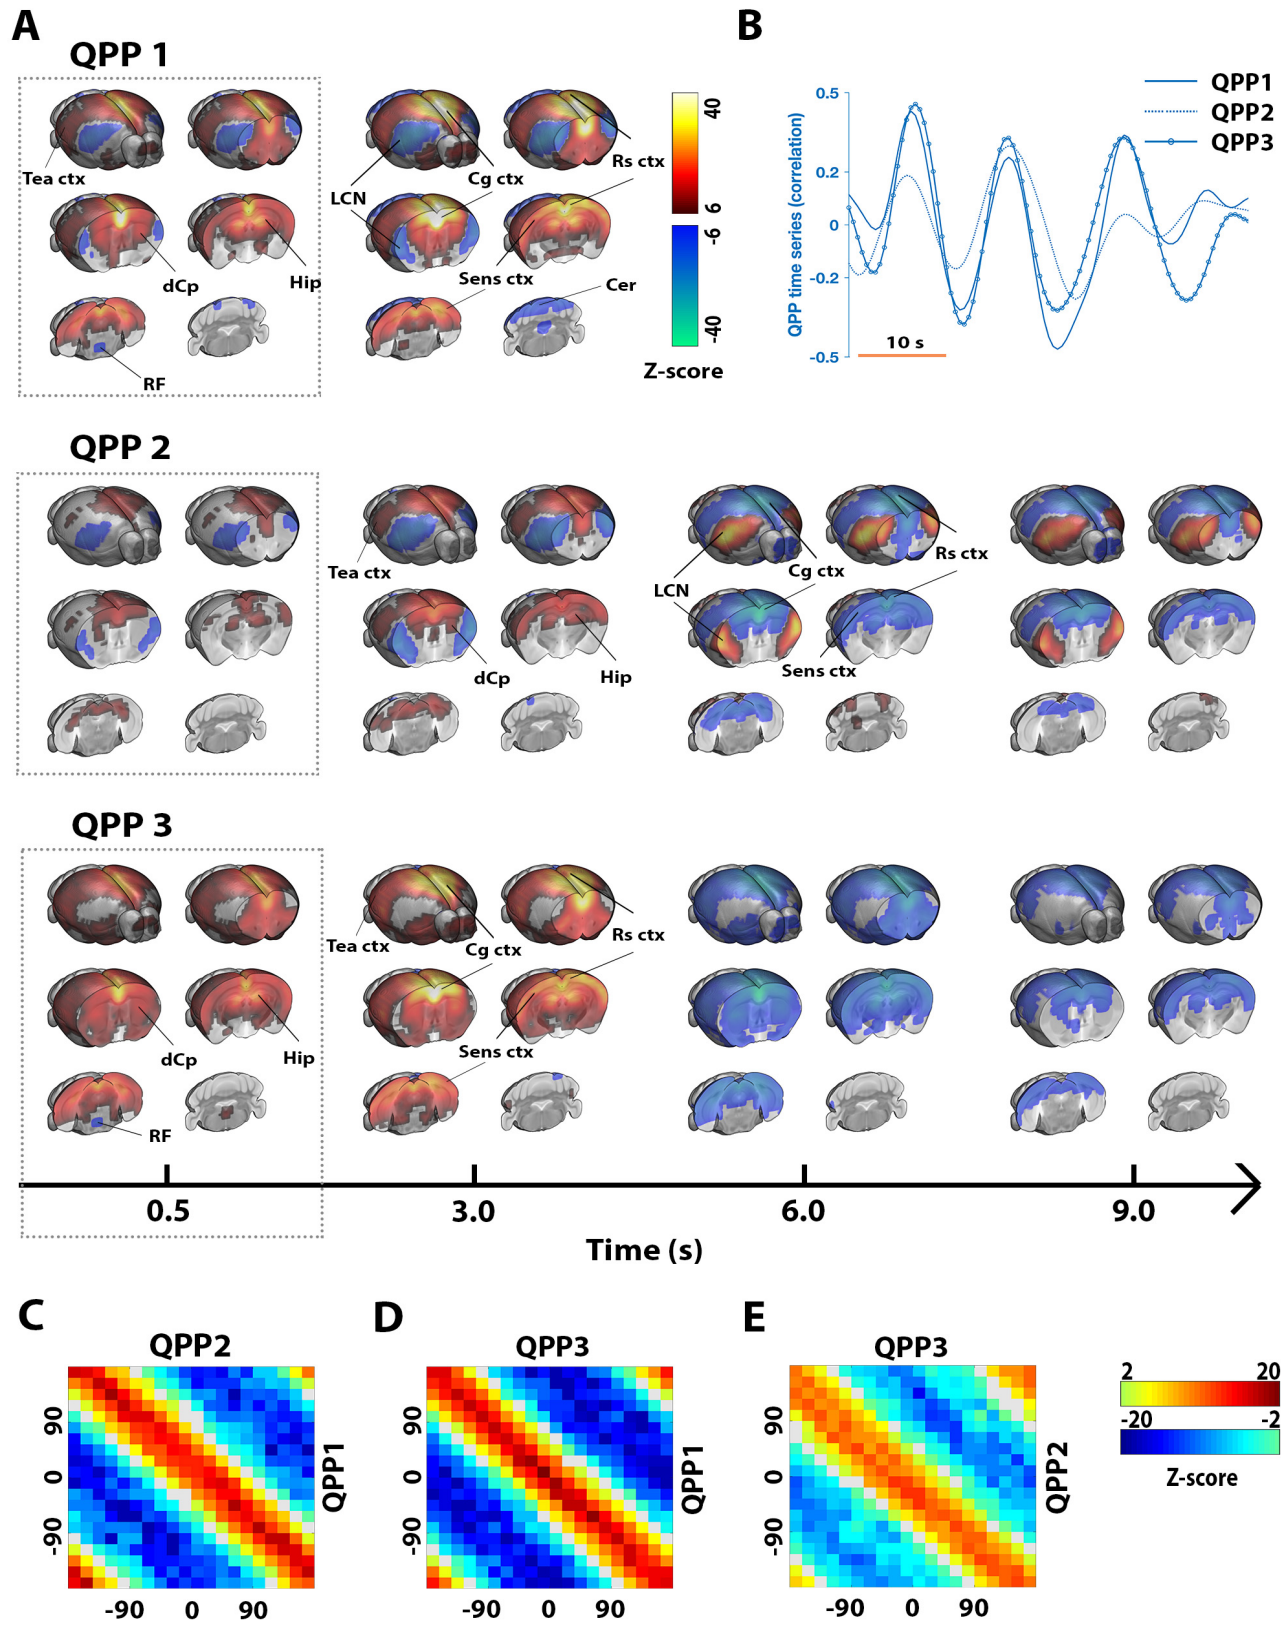

138 **Figure 1. Three temporally co-linear quasi-periodic brain fluctuations identified during**  
139 **resting state.** Three QPPs were identified (A). QPP1 displayed a transient 3 s pattern of anti-  
140 correlation between DMN-like/Sensory networks and the LCN, QPP2 appeared similar as QPP1  
141 but reverses in later frames, and QPP3 displayed cycling wide-spread activation and deactivation.  
142 Relevant brain areas are marked; DMN-like areas included Cg ctx, Rs ctx, Tea ctx, Hip, and dCp.  
143 The three QPPs displayed a high degree of co-linearity, evident both visually (B) and from phase-  
144 phase coupling (C-E). A-E) n = 71 scans. A) QPPs are displayed on the same time axis [alignment  
145 through cross-correlation of QPP correlation vectors (B)]. Maps display Z-scores [Z-test with H0  
146 through randomized image averaging (n=1000), FDR  $p < 10^{-7}$ , cluster-correction 4 voxels]. B)  
147 Single subject excerpt. QPP correlation vectors represent Pearson correlations of QPPs with  
148 functional image series. C-E) Phase-phase plots show Z-scores; center red diagonal marks strong  
149 co-phasic dynamics [first level Z-test with H0 through randomized circular shuffling (n=1000);  
150 second level Z-test, FDR  $p < 0.05$ ]. Abbreviations. *Quasi-periodic pattern, QPP; DMN, Default*  
151 *mode network; Lateral cortical network, LCN; Hippocampus, Hip; dorsal Caudate Putamen, dCp;*  
152 *Cingulate cortex, Cg ctx; Retrospleneal cortex, Rs ctx; Sensory cortex, Sens ctx; Cerebellum, Cer;*  
153 *Reticular formation, RF; False-discovery rate, FDR; repetition time, TR.*

---

## 154 155 **Co-linearity with global brain fluctuations**

156 Given that DMN-TPN anti-correlations (reflected in the QPPs) and fluctuations in the global fMRI  
157 signal have independently been demonstrated to have relationships to sensory variance and/or  
158 changes in arousal, we next investigated the relationship between the global signal and QPPs. The  
159 global signal displayed wide-spread activations that strongly involved Sensory and DMN-like  
160 networks, followed by deactivation that was mainly confined to the Retrospleneal and Cingulate  
161 cortex. Interestingly, a focal brain stem deactivation at the level of the reticular formation was  
162 also observed during the widespread activations (**Figure 2A; Video 4**). Given recent findings  
163 indicating that neuromodulatory nuclei may regulate global signal fluctuations, this could suggest  
164 a potential mechanistic link (Liu et al., 2018; Turchi et al., 2018). Further, the global signal  
165 displayed marked temporal overlap with all three identified QPPs (**Figure 2B**) and a power  
166 spectrum similar to QPP1, but further reduced quasi-periodicity (Supplementary **Figure 2**). Phase-  
167 phase plots revealed that QPP3 was highly temporally co-linear with the global signal, followed  
168 by QPP1, which was also strongly co-linear with the global signal, and lastly QPP2, which displayed

169 weaker phase-phase coupling (**Figure 2C-E**). In summary, the results presented in **Figure 1 & 2**  
 170 suggested a slightly varying but consistent temporal alignment of all QPPs as well as the global  
 171 signal, reinforcing their hypothesized link to a common underlying brain state process.

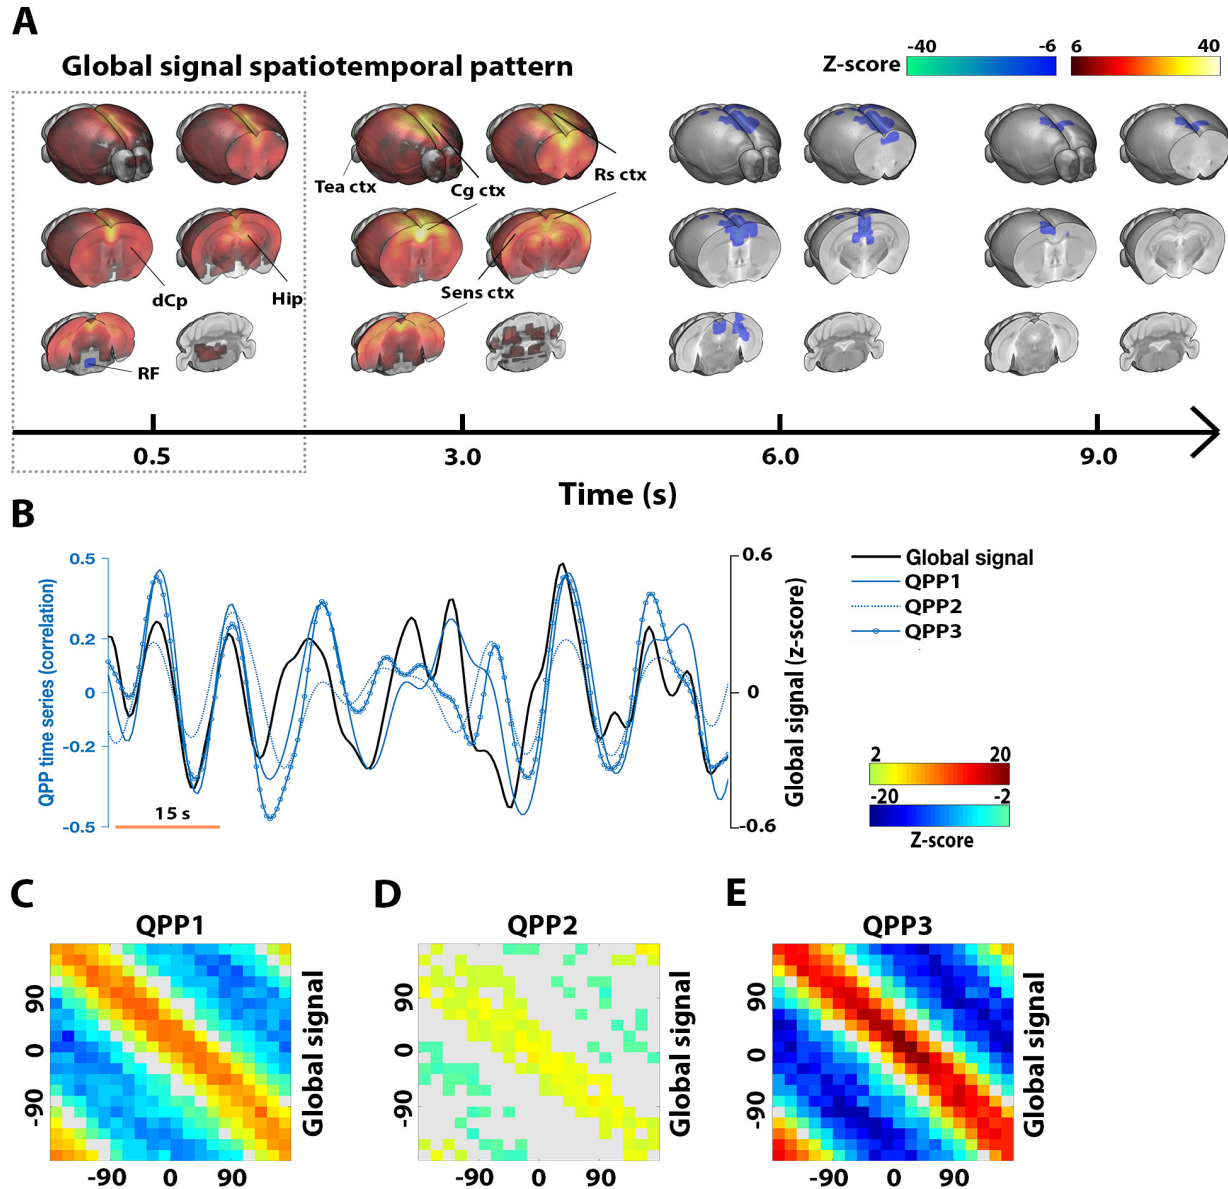

172 **Figure 2. Quasi-periodic brain patterns temporally coincide with global brain fluctuations.**  
 173 The global signal was marked by a first phase of widespread activation, with stronger activations  
 174 in sensory cortex and DMN-like areas (**A**). A focal deactivation was also observed in the dorsal  
 175 brain stem, at the height of the reticular formation. The second phase of the global signal mostly  
 176 incorporated deactivation in Rs ctx and Cg ctx areas. Both visually (**B**) and based of phase-phase



177 plots (C-E), the global signal displayed clear temporal co-linearity with the three observed QPPs,  
178 with decreasing strength from QPP3 to QPP1 to QPP2. A-E) n = 71 scans. A) Maps display Z-  
179 scores [Z-test with H0 through randomized image averaging (n=1000), FDR  $p < 10^{-7}$ , cluster-  
180 correction 4 voxels]. B) Single subject excerpt. QPP correlation vectors represent Pearson  
181 correlations of QPPs with functional image series. Global signal fluctuations are shown as Z-scored  
182 BOLD intensities. Time series were aligned through cross-correlation (global signal peak occurred  
183 on average 2s into QPP1-3). C-E) Phase-phase plots show Z-scores [first level Z-test with H0  
184 through randomized circular shuffling (n=1000); second level Z-test, FDR  $p < 0.05$ ]. *Abbreviations.*  
185 *Quasi-periodic pattern, QPP; DMN, Default mode network; Lateral cortical network, LCN;*  
186 *Hippocampus, Hip; dorsal Caudate Putamen, dCp; Cingulate cortex, Cg ctx; Retrospleneal cortex,*  
187 *Rs ctx; Sensory cortex, Sens ctx; Cerebellum, Cer; Reticular formation, RF; False-discovery rate,*  
188 *FDR; repetition time, TR;*

---

189

## 190 **Intrinsic brain response to visual stimulation**

191 After determining the properties and temporal relationships of resting state QPPs and the  
192 global signal, we investigated if similar relationships can also be observed during a visual stimulus  
193 processing design that is expected to trigger changes in brain state. To this end, we used a visual  
194 stimulation block design (30s ON – 60s OFF) with intentionally long OFF periods to allow the  
195 activity to return to baseline each time before the next visual activation block. First, to identify  
196 the visually stimulated areas, we used a classical generalized linear model (GLM) approach by  
197 convolving the block-design paradigm with the hemodynamic response function (HRF) in order to  
198 derive the signal predictor (cfr. M&M). Clear activations were observed in areas related to visual  
199 processing: dorsal thalamic nuclei (including Lateral geniculate nucleus; LGN); Superior colliculus  
200 (S. Col), Visual cortex (Vis ctx) and Hippocampus (**Figure 3A**). Then, the QPP spatiotemporal  
201 pattern finding algorithm was used to determine if spatiotemporal patterns (STPs) similar to QPPs  
202 could be observed in the visual fMRI scans. In this case, in addition to the normal analysis, we also  
203 performed the STP estimation after performing global signal regression, which, we reasoned,  
204 could potentially remove brain wide responses induced by visual stimulation that would interfere  
205 with STP detection. Both with and without global signal regression, the resultant STPs were largely

206 dominated by visual activations, and also brain-wide responses in prefrontal and lateral cortical  
207 areas, but they were not clearly reminiscent of resting state QPPs (**Supplementary Figure S4**).

208 To further eliminate STPs directly reflecting visual activation, we also performed the same  
209 analysis after the visual predictor was regressed from the task fMRI scans. Under these conditions,  
210 the spatiotemporal pattern finding algorithm revealed a short 3s STP that was highly similar to  
211 QPP1 during rest (spatial cross-correlation = 0.90; **Figure 3B**). Surprisingly, correlating this STP  
212 with the fMRI time series before regression of the visual or global signal predictors displayed, on  
213 average, a significantly increased correlation with the image series at the start of visual  
214 stimulation blocks (**Figure 3C**). No such response could be reliably observed for longer STPs  
215 (**Supplementary Text; Supplementary Figure S4 & S6**). Notably, the correlation increases of the  
216 3s STP around the start of the visual stimulation were preserved after global signal regression  
217 (**Figure 3D**) as well as after regression of both the global signal and the visual stimulation  
218 predictors (**Figure 3E**). We therefore conjectured that this STP may represent an intrinsic  
219 component triggered by the visual stimulus but does not represent the visual sensory processing  
220 per se. This result is further supported by the higher spatial correlation of this STP with the resting  
221 state QPP in comparison to the visual activation profile (spatial cross-correlation = 0.56 when  
222 excluding significantly activated areas [cfr. **Figure 3A**]) and, in addition, by the fact that this STP  
223 was also observed at different time-points beyond the start of the visual stimulation blocks, such  
224 as during off periods and occasionally at different phases of the visual stimulus (**Supplementary**  
225 **Figure S5**). These results thus suggest that the observed STP represents a default ongoing brain  
226 fluctuation that can be modulated by visual stimulation.

227

228

229

230

231

232

233

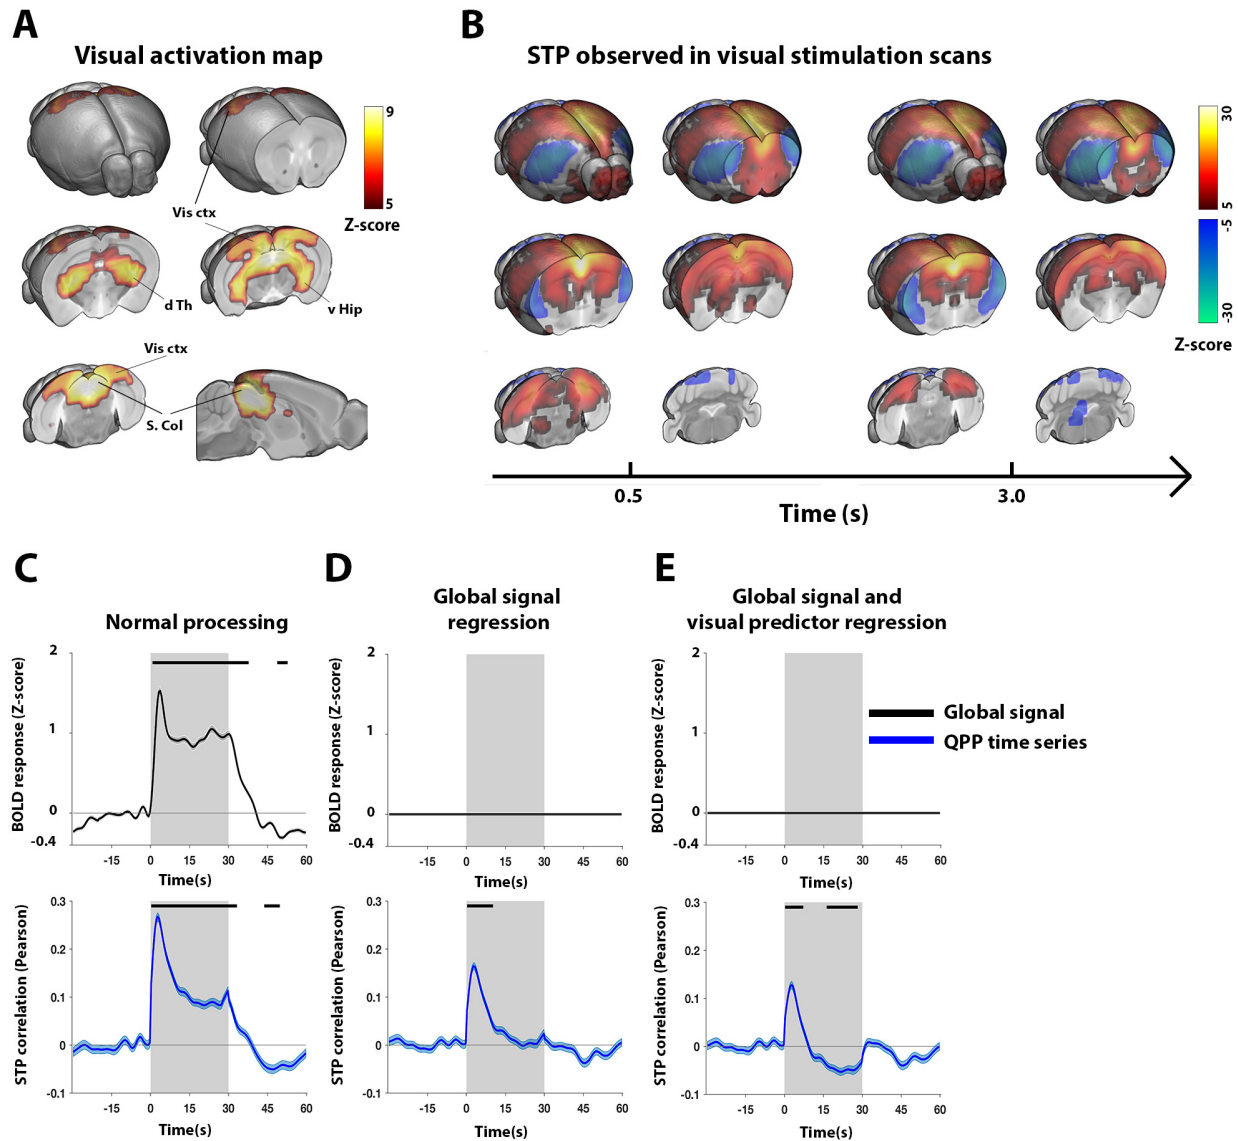

234 **Figure 3. Visual stimulation intrinsically evokes a short quasi-periodic spatiotemporal**  
 235 **pattern, also observed during resting state.** Reliable visual activations were observed in brain  
 236 areas related to visual sensory processing (A). A short 3s STP, highly similar to QPP1 determined  
 237 during resting state scans (spatial correlation = 0.90), was observed after regression of the visual  
 238 predictor (B). This task-derived STP displayed, on average, a peak correlation at the start of  
 239 stimulation trials (C-E) and showed co-linear dynamics with the global signal (C). The early peak  
 240 correlation persisted even after regression of the visual and global signal (E). This short STP thus  
 241 displayed co-linear, yet dissociable, response dynamics with visual activations, suggesting it  
 242 represented an intrinsic response component rather than visual processing *per se*, nor was it solely  
 243 the result of (a-specific) brain-wide activations. A-E) n = 24 scans. A) Maps display Z-scores (first

244 level GLM; second level one sample T-test; T-scores normalized to Z-scores; FDR  $p < 10^{-5}$ , cluster-  
245 correction 4 voxels]. **B)** Maps display Z-scores [Z-test with  $H_0$  through randomized image  
246 averaging ( $n=1000$ ), FDR  $p < 10^{-5}$ , cluster-correction 4 voxels]. **C-E)** The global signal (top) and  
247 STP correlation vector (bottom), each respectively averaged across all trials and animals ( $n = 10$   
248 trials x 24 animals). Grey areas mark trials (ON periods), traces show mean (BOLD time courses  
249 demeaned and variance normalized to 10s OFF period prior to stimulation), patches show STE,  
250 black bars mark significance (one sample T-test, FDR  $p < 10^{-5}$ ). *Abbreviations. Quasi-periodic*  
251 *pattern, QPP; Spatiotemporal pattern, STP; ventral Hippocampus, v Hip; dorsal Thalamus, d Th;*  
252 *Visual cortex, Vis ctx; Superior colliculus, S. Col; standard error, STE;*

---

253

### 254 **Intrinsic quasi-periodicity explains visual response variance**

255 In the previous section, we demonstrated that visual stimulation can modulate, beyond  
256 sensory processing, intrinsic brain dynamics as reflected in STPs. Here, we asked the question if  
257 intrinsic brain dynamics could also influence sensory responses. To this end, we investigated  
258 whether signal fluctuations in visual areas prior to visual stimulation (stimulus OFF interval), could  
259 explain a portion of the visual response variance during stimulation (**Figure 4A**). Across animals  
260 and trials, signals in time bins prior to stimulation were correlated with those in the time bin of  
261 the visual response peak. The prior time point with the highest correlation value (essentially the  
262 one with the highest predictive power) was used to stratify stimulation trials into: high pre-  
263 stimulus (HP), medial pre-stimulus (MP), and low pre-stimulus (LP) visual signal amplitudes. HP  
264 trials displayed significantly higher peak and plateau responses compared to MP trials, while LP  
265 trials displayed significantly lower peak responses compared to HP trials (**Figure 4B**). To gain a  
266 mechanistic understanding of these observations, the same trial sets were evaluated under  
267 conditions of global signal and STP regression (**Figure 4C-E**). Differences in visual responses were  
268 still apparent under conditions of STP regression but became less pronounced (**Figure 4B-D**). After  
269 global signal regression, or combined STP and global signal regression (**Figure 4C&E**), no more  
270 significant differences could be observed between stratified trial sets. The absolute amplitudes  
271 of HP and LP visual signals (prior peaks or dips) decreased respectively by 64% and 49% after STP  
272 regression. With global signal regression, inversions were observed for HP and LP signals. After  
273 global signal regression, absolute amplitudes decreased by respectively 78% and 56%, and, after

274 combined STP and global signal regression, by 56% and 71%. Notably, across the stimulus  
 275 duration, only combined global signal and STP regression reduced the variance of the visual signal  
 276 to levels almost equal to those observed during stable rest periods (**Supplementary Figure S7**).

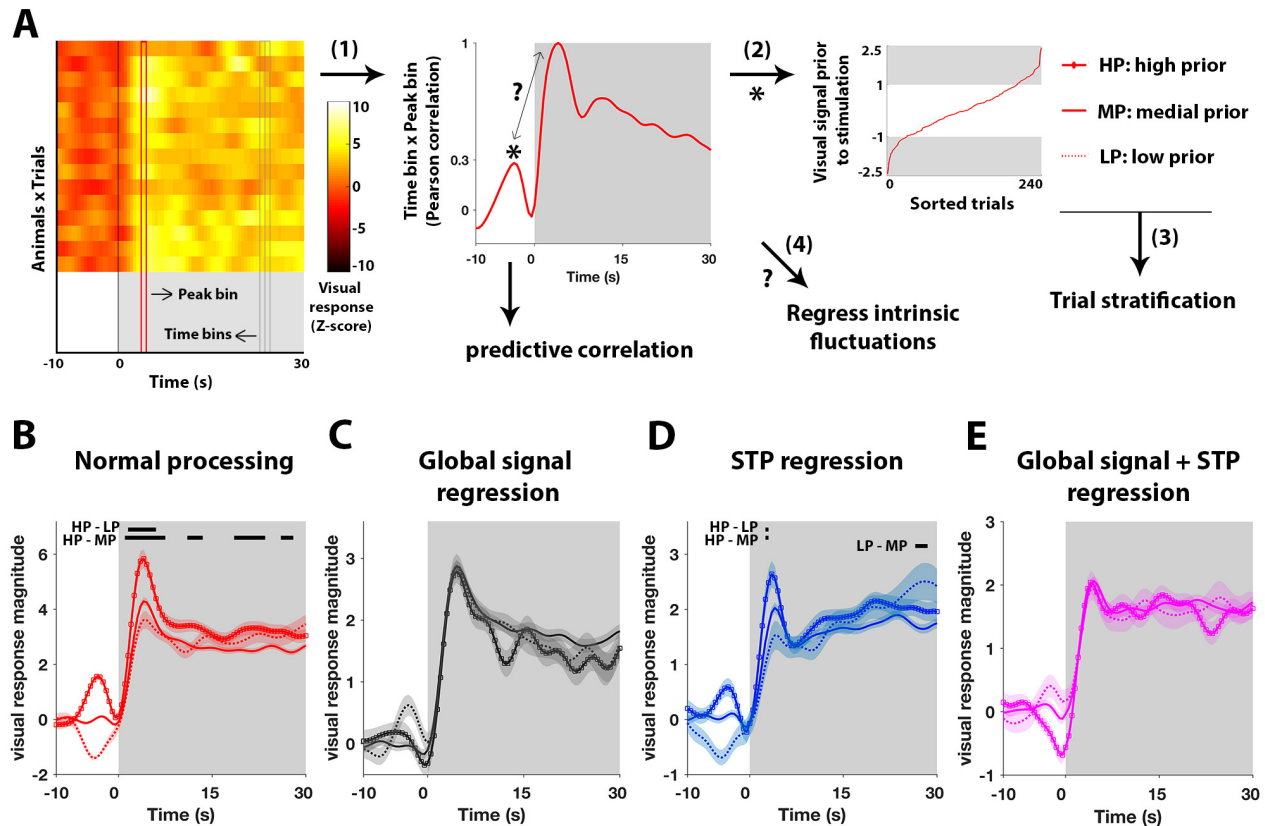

277 **Figure 4. Intrinsic brain-wide quasi-periodicity predicts visual response variance.**  
 278 Stimulation trials were stratified into sets based on intensities in visual areas prior to stimulation:  
 279 high prior (HP), medial prior (MP), and low prior (LP) trials (**A**). With normal processing, clear  
 280 differences were apparent between trial sets, particularly for the initial peak response (**B**). For the  
 281 same trial sets, after STP regression, differences were diminished (**D**), while after either global  
 282 signal (**C**) or STP + global signal regression (**E**), no more differences were observed. **A-E**)  $n = 24$   
 283 animals  $\times$  10 trials. Time traces are demeaned and variance normalized to 10s OFF period prior to  
 284 stimulation. **A**) Illustration of individual stimulation trials, time bins (grey) and response peak bin  
 285 (red). (1) Identifying maximal correlation (\*) of time bins prior to stimulation with response peak.  
 286 (2) Sorting of visual signal intensities prior to stimulation (grey patches  $> 1$  STE). (3) Stratification.  
 287 (4) Evaluating role of intrinsic brain dynamics through regression analyses. **B-E**) Black bars  
 288 indicate significant mean differences between trial sets (One-way ANOVA, FDR (#bins)  $p < 0.05$ ;

289 post hoc Bonferroni correction). *Abbreviations. Spatiotemporal pattern, STP; False-discovery*  
290 *rate, FDR; standard error, STE; analysis of variance, ANOVA.*

---

291

## 292 **Co-linearity with fluctuations in the reticular formation**

293 Our results of the resting state data indicated collinearity of intrinsic brain fluctuations (QPPs  
294 and global signal) suggesting a potential link to an underlying process related to brain state.  
295 Similarly, analysis of visual stimulation scans demonstrated interactions between sensory  
296 processing and intrinsic brain fluctuations, indicating that these processes are finely intertwined.  
297 Interestingly, detailed observation of the QPPs and the global signal pattern unveiled that a focal  
298 area at the dorsal part of the brain stem cycled antagonistically with overall brain-wide activity  
299 (**Figure 5A**). To identify the cytoarchitectonic location of this area, we co-registered the MRI data  
300 to the Allen mouse brain atlas. This revealed that this area contained mainly pontine nuclei of the  
301 reticular formation (RF; **Figure 5B**). The average RF time courses across all three QPPs and the  
302 global signal were highly similar (**Figure 5C**), with an initial significant dip, followed by a significant  
303 peak approximately 4.5s later. Furthermore, to understand if this area could be related to intrinsic  
304 brain fluctuations during visual stimulation, we plotted the average initial time frames of the  
305 event-related activation maps (**Figure 5D**). Surprisingly, significant de-activations in the RF were  
306 observed time-locked to the start of visual stimulation. The time course of RF activity is presented  
307 in **Figure 5E**.

308

309

310

311

312

313

314

315

316

317

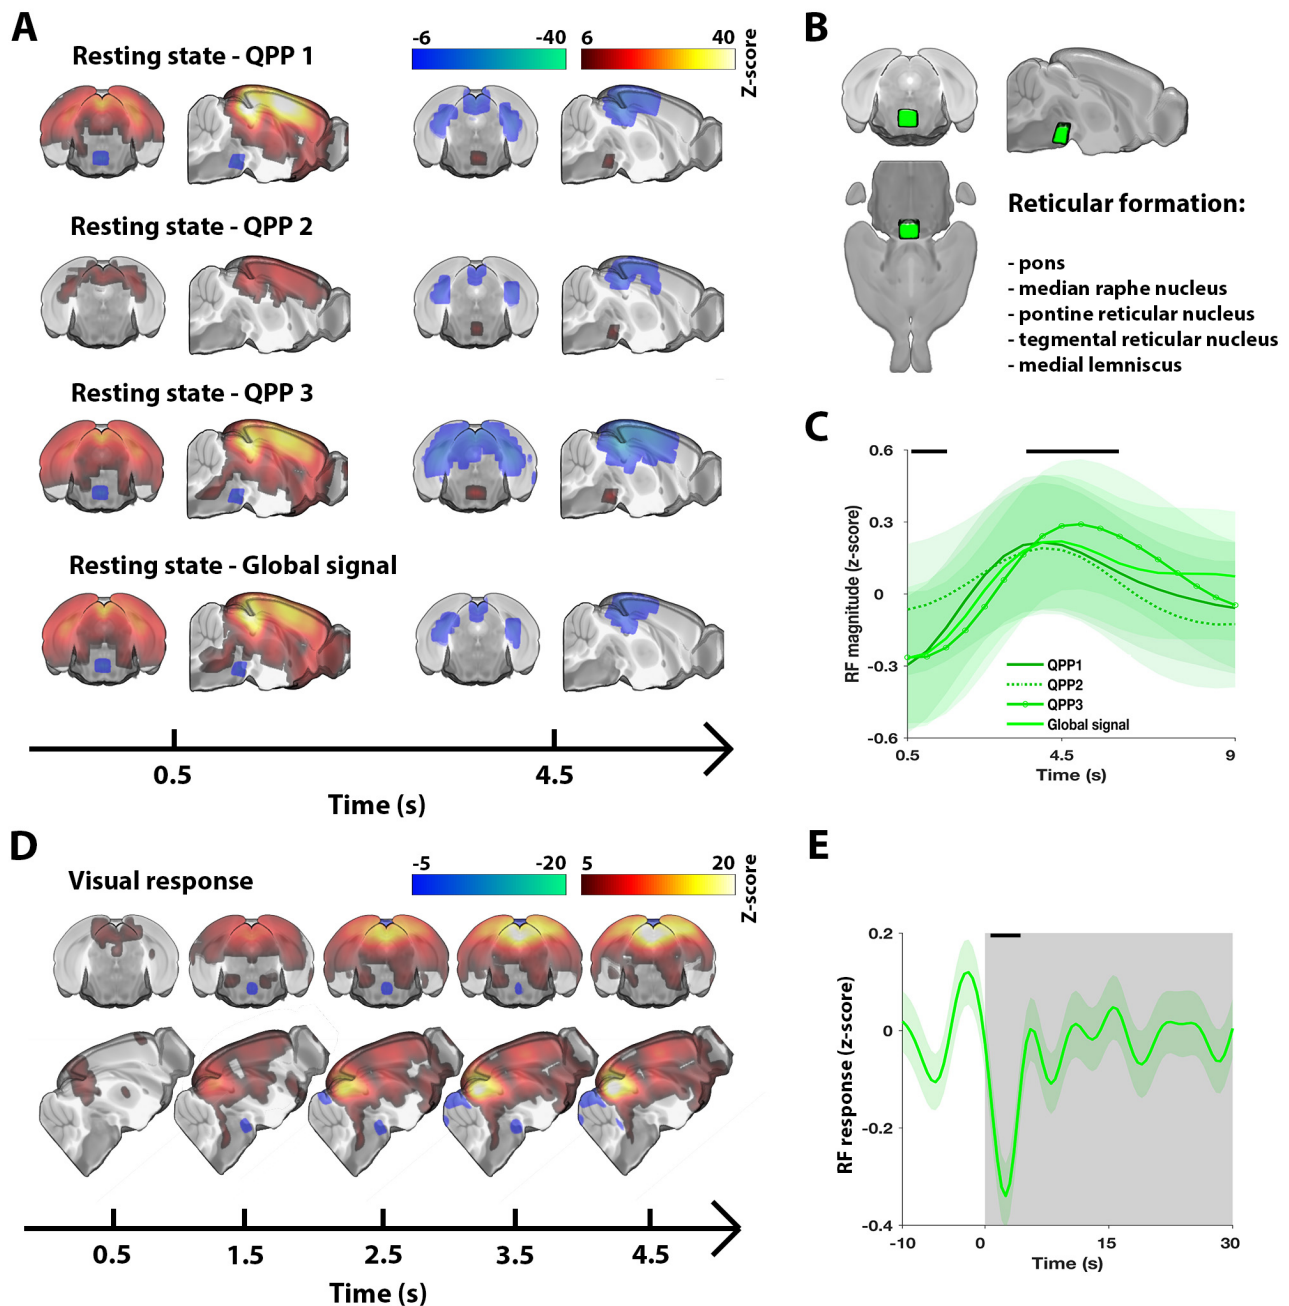

318 **Figure 5. Activity in the reticular formation couples with quasi-periodic brain dynamics**  
 319 **across the rest/task spectrum.** All QPPs and the global signal displayed significant activity in a  
 320 focal dorsal brain stem area. Anatomical labelling through co-registration with the Allen mouse  
 321 brain atlas highlighted that this area contained nuclei of the reticular formation (**B**). Time courses  
 322 of the RF were on average highly similar across investigated spatiotemporal patterns (**C**). The RF  
 323 also displayed de-activation at the start of stimulation blocks (**D-E**). **A**)  $n = 71$  scans. Maps display  
 324 Z-scores [Z-test with  $H_0$  through randomized image averaging ( $n=1000$ ), FDR  $p < 10^{-7}$ , cluster-

325 correction 4 voxels]. **B)** Visual rendering of focal brain area observed in (A) and (D). List indicates  
326 anatomical structures contained within this area. **C)**  $n = 71$  scans. Average RF time series across  
327 respective QPP correlation or global signal peaks (traces show mean; patches show STE). Black  
328 bars mark significant deviation from zero [statistical test as in (A)]. **D)** Visual response averaged  
329 across trials and animals ( $n = 10$  trials  $\times$  24 animals) for first 5s of stimulation. Voxel-wise time  
330 courses were demeaned and variance normalized to 10s OFF period prior to stimulation. Maps  
331 display Z-scores [one sample T-test; T-scores normalized to Z-scores; FDR  $p < 10^{-5}$ , cluster-  
332 correction 4 voxels]. **E)** Grey areas mark trials (ON periods), trace shows visual area signal mean,  
333 patch shows STE, black bar marks significance (one sample T-test, FDR  $p < 10^{-5}$ ). *Abbreviations.*  
334 *Quasi-periodic pattern, QPP; False-discovery rate, FDR; standard error, STE.*

---

335  
336  
337  
338  
339  
340  
341  
342  
343  
344  
345  
346  
347  
348  
349  
350  
351  
352  
353  
354



## 355 Discussion

356 Many questions remain on the mechanisms through which intrinsic brain dynamics and  
357 sensory processing interact. We sought answers using fMRI in lightly anesthetized mice to track  
358 spatiotemporal activity patterns at the whole brain level, an approach that may provide new  
359 insights in comparison to more commonly performed invasive single site recordings. A vast  
360 emerging literature suggests that intrinsic global signal fluctuations, DMN-TPN anticorrelations,  
361 arousal dynamics, and neuromodulation, may all share common ground and could affect sensory  
362 processing. Our results provide evidence that quasi-periodic patterns captured an overall  
363 temporal alignment between these related phenomena. We further showed that, with high  
364 probability, visual stimulation evoked a spatiotemporal pattern highly similar to QPPs, with  
365 persevered co-linearity to the brain global signal and deactivations in the reticular formation.  
366 Finally, we showed that QPPs and the global signal could significantly predict a portion of the  
367 visual response variance. In summary, our findings suggest that QPPs and the global signal in mice  
368 likely capture a single brain-state fluctuation, mechanically coupled through neuromodulation,  
369 and we provide evidence that these spatiotemporal patterns affect sensory response variance.

370 QPPs observed here were highly consistent with those observed in previous mouse studies  
371 using single slice recordings (Belloy et al., 2018b, 2018a). Specifically, QPPs displayed widespread  
372 anti-correlation between the commonly observed mouse LCN and DMN-like/sensory networks  
373 (Grandjean et al., 2017; Liska et al., 2015; Zerbi et al., 2015). No direct evidence has so far been  
374 presented to identify a mouse TPN-like network, but the LCN has been suggested as the most  
375 likely candidate (Liska et al., 2015; Zerbi et al., 2015). This is further supported by the LCN's anti-  
376 correlation with the DMN-like network, both in conventional functional connectivity analysis and  
377 within QPPs, highlighting consistency with human resting state network properties. We therefore  
378 discuss the LCN interchangeably with "mouse TPN-like network". Further, the three identified  
379 QPPs displayed a high degree of temporal co-linearity, suggesting they likely reflected variants in  
380 a single spatiotemporal pattern. One possibility is that the shorter QPP1 was more likely to occur  
381 (stronger correlation vector) while the longer QPP2 (weaker correlation vector) identified  
382 instances where QPP1 oscillated and reversed in later frames. Alternatively, it is possible that due

383 to temporal collinearity with brain-wide (de-)activations (i.e. the global signal and QPP3), the  
384 spatiotemporal pattern finding algorithm would have been biased towards lower correlation  
385 amplitudes for QPP2. The infraslow network dynamics observed here within QPPs are consistent  
386 with the quasi-oscillatory dynamics of co-activation patterns (CAPs, i.e. instantaneous brain  
387 activity patterns) previously observed in humans and mice (Gutierrez-Barragan et al., 2018; Liu  
388 and Duyn, 2013). While CAPs identified a richer set of dynamic network topologies, the QPP  
389 approach identified the most dominantly recurring brain-wide spatiotemporal pattern that likely  
390 comprised several temporally aligned CAPs. Notably, QPP1 displayed diminished periodicity  
391 compared to QPP2/3. This could suggest that shorter QPPs observed here more closely resemble  
392  $1/f$  aperiodic brain dynamics (He and Raichle, 2009). However, short QPPs have been shown to  
393 extend to variable-length QPPs (Belloy et al., 2018a). The signal of QPP1 is thus comprised of  
394 several band-limited oscillations (i.e. it displays a scale-free autocorrelation profile), which can  
395 give rise to an arrhythmic power spectrum (Palva and Palva, 2012).

396 The global signal spatiotemporal pattern displayed wide-spread activations, with stronger focal  
397 increases in sensory cortex and core DMN-like areas such as the dCP, dTh, dHip, Cg and Rs cortex.  
398 Limited (quasi-)periodicity was observed in the global signal's temporal structure. This is in line  
399 with prior human studies that indicated the DMN-like network and sensory cortex as strong  
400 contributors to the global signal, which displayed only faint periodicity (Billings and Keilholz, 2018;  
401 Fox et al., 2009). We observed here that the global signal and QPPs displayed strong temporal  
402 collinearity. At the same time, QPPs/STPs that displayed regional anti-correlation could still be  
403 detected after global signal regression in both resting state and visual fMRI scans. The latter is  
404 consistent with prior work on QPPs (Belloy et al., 2018a; Majeed et al., 2011; Yousefi et al., 2018),  
405 and is reminiscent of the relationship between DMN-TPN anticorrelation and global signal  
406 regression (Fox et al., 2009; Murphy and Fox, 2016). Specifically, estimation and regression of  
407 QPPs and the global signal are qualitatively distinct (Billings and Keilholz, 2018). On one hand,  
408 global signal regression zero centers the instantaneous distribution of brain intensities, thereby  
409 preserving time-varying inter-regional variation. Even when strongly co-linear, global signal  
410 regression cannot fully remove QPPs with regional anti-correlation. On the other hand, QPP time  
411 courses reflect time-varying image similarities to a recurrent spatiotemporal template, which

412 contains both global and regional variation. Inherently, some overlap between QPPs and the  
413 global signal is thus expected, but the extent of temporal alignment that was observed in this  
414 study, and the specific involvement of major resting state networks, are striking and suggestive  
415 of a shared physiological substrate. Another resting state study in mice, using different  
416 anesthesia, also observed strong phase coupling between the global signal and oscillatory  
417 activation patterns similar to QPPs described here (Gutierrez-Barragan et al., 2018), suggesting  
418 our findings can be generalized across mouse studies.

419 Activation maps in response to visual stimulation were highly consistent with those previously  
420 reported in mice (Niranjan et al., 2016). Visual responses displayed fast peak activations followed  
421 by stable plateau periods, consistent with fast haemodynamics in the mouse brain (Drew et al.,  
422 2011; Pisauro et al., 2013). Most mouse fMRI studies to date have focussed primarily on  
423 somatosensory stimulation paradigms, reporting strong variability in evoked responses and a-  
424 specific brain-wide activations on top of somatosensory networks responses (Adamczak et al.,  
425 2010; Reimann et al., 2018; Schlegel et al., 2015; Schroeter et al., 2016, 2014). These studies  
426 indicated that part of the brain-wide responses was due to transient increases in mean arterial  
427 blood pressure, caused by the arousal-promoting noxious nature of presented stimuli. In pilot  
428 studies, we did not clearly observe such responses for our visual stimulation and anesthesia  
429 protocols. Both QPPs and the global signal have furthermore been related to a neuronal substrate  
430 (Grooms et al., 2017; Pan et al., 2013; Schölvinck et al., 2010), while no clear link between QPPs  
431 and physiology could be established in prior mouse work (Belloy et al., 2018a). We thus propose  
432 that global signal and STP dynamics in response to visual stimulation may indeed reflect an  
433 arousal-related response, but one that is more likely of neuronal origin (see further below).

434 The visual-evoked STP indicated deactivation of the TPN-like network and activation of the  
435 DMN-like/sensory networks. This apparent task-related DMN activation may be considered  
436 counter-intuitive with regard to conventional observations that task engagement causes  
437 decreased DMN activity and increased TPN activity (Fransson, 2006; Northoff et al., 2010).  
438 Similarly, we observed that DMN activity in QPPs and the global signal correlated with larger visual  
439 responses, while some studies related DMN activity to decreases in sensory responses and

440 increased response times (Helps et al., 2009; Weissman et al., 2006). In contrast, other studies  
441 reported a less canonical role of the DMN that is more consistent with the current findings  
442 (Esterman et al., 2013; Kucyi et al., 2017, 2016; Sadaghiani et al., 2009). In the latter, DMN activity  
443 reflected an attentive state, while TPN activity was associated with increased behavioral variance  
444 and suppressed attention. For instance, DMN and TPN activity just prior to auditory stimuli  
445 correlated respectively with significant increases and decreases in stimulus perception hit rate  
446 (Sadaghiani et al., 2009). This is consistent with our finding that a visual signal peak four-to-three  
447 seconds prior to stimulation could predict larger visual responses, but that both the prior visual  
448 signal amplitude and response variance were reduced after QPP and global signal regression.  
449 Some of the intrinsic self-predictive power of brain areas observed here, and in prior studies, may  
450 therefore be attributable to the ongoing anti-correlations between the DMN and TPN. This  
451 hypothesis was formally proposed in prior work, suggesting that global rhythmic anti-correlations  
452 of the DMN and TPN cycle the brain state between attentional lapses and periods of improved  
453 sensory entrainment (Lakatos et al., 2016). Currently, it remains unclear into what extent DMN-  
454 and TPN-like task dynamics in mice would be comparable to those in humans. Under anesthetized  
455 conditions, it is less likely that DMN/TPN dynamics would actually reflect human canonical  
456 responses to a cognitive challenge. It thus seems more likely that QPPs and the evoked STP in fact  
457 reflect a brain state dynamic with distinct physiological and arousal-related properties.

458 In addition to the visually-evoked STP, we also observed a temporally co-linear global brain  
459 response during stimulation. The global signal displayed strong predictive power for visual  
460 responses, while global signal regression reduced visual response variance. In agreement, several  
461 studies have shown that global brain fluctuations, and the reflected changes in global brain state,  
462 can modulate sensory responses (Lee and Dan, 2012; Mcginley et al., 2015; Pisauro et al., 2016;  
463 Schölvinck et al., 2015; Schroeder and Lakatos, 2010). In mice, global haemodynamic fluctuations  
464 were correlated to fluctuations in arousal state and superimposed on local neuronal processing of  
465 visual input (Pisauro et al., 2016). In cats, during rest periods and in response to visual stimulation,  
466 global fluctuations underlied a high degree of shared variance across primary visual cortex  
467 neurons (Schölvinck et al., 2015). After global signal regression, the inter-trial variability in visual  
468 responses could be reduced in a similar fashion to what we observed here for mouse BOLD

469 responses. Our findings thus strengthen the emerging concept that, in addition to noise  
470 components, global signal fluctuations also reflect arousal fluctuations (Liu et al., 2017).

471 A consistent observation across all spatiotemporal patterns was the co-linear activity in a focal  
472 brain stem area that comprised brainstem nuclei of the reticular formation. This may provide  
473 some mechanistic understanding for the arousal-related phenomena seen in this study. The  
474 ascending reticular activating system (comprising the RF) is responsible for promoting  
475 wakefulness and attention through the orchestrated activity of neuromodulatory nuclei, such as  
476 raphe nucleus, locus coeruleus and nucleus basalis. Liu et al. (2018) showed that the global signal  
477 coincides with deactivation in the nucleus basalis in humans, while Turchi et al. (2018) could  
478 suppress global signal fluctuations by directly inactivating this cholinergic nucleus in macaques.  
479 Additionally, optogenetic activation of the serotonergic dorsal raphe nucleus in mice caused  
480 widespread deactivation of DMN-like areas (Grandjean et al., 2019), which reflected the  
481 spatiotemporal patterns observed in our study. Further, neuromodulatory structures are natural  
482 rhythm generators that provide infraslow patterned input to the brain (Drew et al., 2008).  
483 Different nuclei in humans have been functionally connected to the DMN (dorsal raphe nucleus)  
484 and TPN (locus coeruleus) (Bär et al., 2016). This could help reconcile the co-linear dynamics  
485 between QPPs and the global signal, which may arise due to the complex interplay of subcortical  
486 nuclei. Finally, neuromodulation can adaptively affect brain states to modulate processing of  
487 sensory stimuli (Lee and Dan, 2012; Safaai et al., 2015), which could explain transient deactivation  
488 of the RF in response to visual stimulation (additional discussion in **Supplementary Text**). Future  
489 experiments will be required to tease out the potential neuromodulatory regulation of QPPs, the  
490 global signal, and neuronal circuit structure of arousal in the mouse brain, using tools such as  
491 optogenetics and pupil-tracking (Carter et al., 2010; Joshi et al., 2016; Reimer et al., 2014).

492 In summary, this study provides insights into the mechanisms that couple resting state  
493 dynamics to sensory processing and points out research avenues to elucidate their underlying  
494 neural substrate. Our work is directly relevant for other pre-clinical studies in rodent models that  
495 likely face some of the intrinsic sensory response variability highlighted here. Lastly, our analytical

496 approach may help increase understanding of neurological disorders in which neuromodulation  
497 and arousal are pertinent.

498

499

500

501

502

503

504

505

506

507

508

509

510

511

512

513

514

## 515 **Material and Methods**

### 516 **Ethical statement**

517 All procedures were performed in strict accordance with the European Directive 2010/63/EU  
518 on the protection of animals used for scientific purposes. The protocols were approved by the  
519 Committee on Animal Care and Use at the University of Antwerp, Belgium (permit number 2017-  
520 38), and all efforts were made to minimize animal suffering.

### 521 **Animals**

522 MRI procedures were performed on 24 male C57BL/6J mice (Charles River) between 18 and 22  
523 weeks old. Animals were first anesthetized with 3.5% isoflurane and prepared in the scanner  
524 according to routine practice (details in **Supplementary methods**). For functional scans, animals  
525 were anesthetized with a 0.075mg/kg bolus subcutaneous injection of medetomidine (Domitor,  
526 Pfizer, Karlsruhe, Germany), after which isoflurane was gradually lowered to 0.5% over the course  
527 of 20min. A subcutaneous catheter allowed continuous infusion of 0.15mg/kg/h medetomidine  
528 starting 15min post-bolus. This anesthesia regime is similar to an established optimal light  
529 anesthesia protocol for mouse rsfMRI (Belloy et al., 2018a; Grandjean et al., 2014). Acquisition of  
530 functional scans started 30min post-bolus. Physiological parameters were monitored for stability  
531 throughout scan sessions. Animals were scanned twice, two weeks apart (**Supplementary Table**  
532 **1**).

### 533 **MRI procedures and registration**

534 MRI scans were acquired on a 9.4T Biospec system (Bruker), with a four-element receive-only  
535 phase array coil and volume resonator for transmission. Briefly, anatomical scans were acquired  
536 in three orthogonal directions to render slice position consistent across animals. Initial fMRI scans  
537 lasted 10min, and directly following fMRI scans (rest or visual stimulation) lasted 15min. In each  
538 session a 3D anatomical scan was also acquired. The open source registration toolkit Advanced  
539 Normalization Tools (ANTs) was used to construct a study-based 3D anatomical template. The  
540 study EPI template was then registered, in a 2-stage procedure, to the Allen brain mouse atlas  
541 (Oh et al., 2014). Further presented analysis of functional EPI data was thereby kept within the  
542 EPI template space. Additional details are provided in **Supplementary Methods**.

### 543 **Visual stimulation design**

544 Bin-ocular visual stimulation with flickering light (4Hz, 20% duty cycle) was presented to the  
545 animals by means of a fiber-optic coupled to a white LED, controlled by a digital voltage-gated  
546 device (Max-Planck Institute for Biological Cybernetics, Tuebingen, Germany) and a RZ2 bioamp  
547 processor (Tucker-davis technologies). Stimulation paradigms were triggered by a TTL pulse  
548 output from the scanner at the beginning of the EPI sequence. Visual stimulation scans lasted 15  
549 min and visual stimuli were presented in a block design: 30s ON, 60s OFF, repeated 10 times with  
550 the first stimulus starting 30s post scan start.

### 551 **Functional scan pre-processing**

552 Motion parameters were obtained for each scan (six rigid body transformation parameters),  
553 images were realigned and normalized to the study-based mean EPI template and smoothed ( $\sigma =$   
554 2 pixels) [Statistical Parametric Mapping (SPM12) software (Wellcome Department of Cognitive  
555 Neurology, London, UK); MATLAB2017b]. Motion parameters were regressed out of the fMRI  
556 scans and images were filtered using a 0.008-0.2Hz butterworth IIR filter, detrended, demeaned  
557 and normalized to unit variance (z-score operation). For visual-evoked fMRI scans, demeaning  
558 and variance normalization was performed with regard to 10s OFF periods prior to stimulation (z-  
559 scoring procedure:  $Z = (x - \mu) / \sigma$ , with  $x$  = sample,  $\mu$  = sample mean,  $\sigma$  = sample standard  
560 deviation). Time points at start and end of the image series were removed to account for filtering  
561 effects. Depending on the desired analysis, global signal regression (GSR) was performed. To  
562 determine spatiotemporal patterns, a brain mask was used to exclude ventricles.

### 563 **Spatiotemporal pattern finding algorithm**

564 QPPs/STPs were determined using the spatiotemporal pattern finding algorithm described by  
565 Majeed and colleagues in 2011 (Majeed et al., 2011). Shortly, the algorithm identifies BOLD  
566 spatiotemporal patterns (distribution and propagation of BOLD activity across different brain  
567 areas over the duration of a specific predefined time-window) that recur frequently over the  
568 duration of the functional scans. The process is unsupervised and starts by randomly selecting a  
569 starting template from consecutive frames in the image series, corresponding to the predefined  
570 time-window length. Then, this template is compared with the image series via sliding template  
571 correlation (STC). A heuristic correlation threshold ( $\rho > 0.1$  for the first three iterations and  $\rho > 0.2$



572 for the rest) is used to define sets of images at peak threshold crossings that are averaged into a  
573 new template. This process is repeated until convergence. As the outcome of this procedure  
574 depends on the initial, randomly selected starting pattern, the process was repeated multiple  
575 times ( $n = 250$ ) with randomly selected seed patterns from different time-points in the time-  
576 series. The process was also repeated for multiple window lengths (3-12s, 1.5s intersperse) as STP  
577 length is not known *a priori*. QPPs were obtained by applying the algorithm to the concatenated  
578 time series of all individual subjects within a group. Detailed descriptions of the algorithm, and  
579 videographic illustrations, are provided elsewhere (Belloy et al., 2018a; Majeed et al., 2011).

### 580 **Quasi-periodic pattern selection**

581 After the spatiotemporal pattern finding algorithm concluded identifying the large set ( $n = 250$   
582  $\times 7$  window sizes) of possible patterns, we proceeded to identify the patterns of interest based  
583 on prior knowledge, their similarity, and their STCs (herein often referred to as QPP time series)  
584 that indicate occurrences (correlation peaks) and time-varying similarity to the functional scans.  
585 It was previously established that both short (3s) and long (9s) QPPs can be uniquely identified  
586 from mouse (Belloy et al., 2018a, 2018b), and rat (Majeed et al., 2011), rsfMRI recordings. In these  
587 studies, short 3s QPPs displayed the strongest time-varying correlation and were always marked  
588 by spatial anti-correlation of various brain areas, while longer QPPs displayed lower amplitude  
589 time-varying correlation, could also display brain-wide activity, and tended to capture bi-phasic  
590 extensions of shorter QPPs. Given these known priors, we opted to first identify 3s QPPs. Then,  
591 QPPs were also defined for other window sizes. Specifically, for each window size, we selected as  
592 the most representative QPP the one that displayed the highest sum of correlation values at QPP  
593 occurrences [cfr. (Yousefi et al., 2018)]. From the resultant set of QPPs, the window size  
594 corresponding to a full cycle bi-phasic pattern was calculated [cfr.(Belloy et al., 2018a)]. All  
595 analyses were performed with and without global signal regression; findings for both approaches  
596 were integrated (cfr. below). Additional details are provided in **Supplementary Methods**.

### 597 **Significance maps**

598 The number of QPP occurrences ( $\rho > 0.2$  threshold crossings) decreases with longer window  
599 sizes. Further, QPPs were determined with and without global signal regression. Therefore, to aid  
600 QPP comparisons, a homogenization procedure was employed. QPPs determined after global

601 signal regression, were correlated with image series for which no global signal regression was  
602 performed. The resultant correlation vector was used to calculate QPP occurrences. Further, after  
603 QPPs were defined, the correlation threshold ( $\rho > 0.2$ ) was reduced for longer QPPs so that an  
604 equal number of occurrences was achieved as for short 3s QPPs. For each QPP, significant voxels  
605 were defined from each voxel's intensity distribution of unique image frames contained within  
606 the QPP. This was evaluated for each QPP time frame respectively and through  $H_0$  estimation.  
607 Specifically, for each respective voxel and time frame within a QPP, a T-score was calculated ( $T =$   
608  $\mu / (\sigma / \sqrt{n})$ ) for its distribution of signal intensities ( $\mu =$  mean;  $\sigma =$  standard deviation,  $n =$  sample  
609 size). For an equal  $n$ , 1000 reference distributions were calculated through randomized image  
610 frame selection. For each reference, a respective T-value was determined to construct the  $H_0$   
611 distribution. A Z-test was employed to evaluate significance. Resultant significance maps were  
612 false discovery rate (FDR)- and cluster-size corrected (threshold = 4 voxels).

613 To visualize the global signal, image frames surrounding global signal peaks were averaged into  
614 a spatiotemporal template, i.e. a global signal co-activation pattern (CAP). This approach is  
615 consistent with the methodology presented by Liu and Duyn (Liu and Duyn, 2013), but includes  
616 temporal extension of signal peaks. A detailed description of this method is described elsewhere  
617 (Belloy et al., 2018a). An activation map of the global CAP, and related statistical analysis, was  
618 calculated in the same way as described for QPPs (cfr. above).

619 As a final homogenization step additional image frames that followed the core of short QPPs  
620 (e.g. 3s) were included to allow comparison with other longer spatiotemporal patterns. In this  
621 procedure, there is no re-estimation of the QPP or its correlation vector, only additional image  
622 frames following correlation peaks are averaged into the elongated template.

623 For each visual fMRI scan, the stimulation paradigm was convolved with a haemodynamic  
624 response function (HRF). The resultant visual predictor was used within a generalized linear model  
625 (GLM), i.e. first-level analysis, to derive subject voxel-wise parameter coefficients ( $\beta$ ) and T-  
626 values. Subject activation T-maps were then evaluated at the group level, i.e. second-level  
627 analysis, by means of a one-sample T-test ( $H_0$  distribution:  $\mu = 0$  and  $\sigma =$  sample  $\sigma$ ). Resultant  
628 group average activation maps were FDR- and cluster-size corrected (threshold = 4 voxels). The  
629 HRF was based on a literature-driven ground truth estimate (details in **Supplementary Methods**).

630 Further, time-frame by time-frame group-average visual activation maps were also constructed  
631 by analyzing voxel-wise intensity distributions at each time point across all trials and animals ( $n =$   
632 24 animals  $\times$  10 trials). One-sample T-tests were used to define significant (de-)activations ( $H_0$   
633 distribution:  $\mu = 0$  and  $\sigma = \text{sample } \sigma$ ). Resultant frame-wise group-average activation maps were  
634 FDR- and cluster-size corrected (threshold = 4 voxels). For consistency, T-scores were  
635 standardized to Z-scores using the normal cumulative distribution function.

### 636 **Phase-phase coupling**

637 Contrary to conventional correlation-based approaches, phase-phase coupling analysis can  
638 provide more detailed information regarding the relationship of two signals. Particularly, it can  
639 be used to calculate whether signals display in-phase, out-of-phase, or anti-phase properties,  
640 while no assumptions are made about causality or directionality. Prior work established that  
641 phase estimation for QPPs from rat rsfMRI data is feasible (Thompson et al., 2014), as well as for  
642 global signal and network fluctuations from mouse rsfMRI (Gutierrez-Barragan et al., 2018). Thus,  
643 for each subject respectively, the instantaneous phase of QPP or global signal time series were  
644 extracted using the Hilbert transform. Phase data was then binned across the  $[-\pi, \pi]$  range and  
645 the number of matching observations between two respective signals were counted on phase-  
646 phase grids (normalized to scan length). For each subject, an  $H_0$  distribution was obtained by  
647 randomly ( $n=1000$ ) shifting one of two time-courses forward or backward in time  $[-10s:0.5s:10s]$   
648 and filling in the phase-phase grid at each instance. For each voxel in the grid, the real value was  
649 evaluated with regard to the normal  $H_0$  distribution and a Z-score was derived. This procedure  
650 was repeated for all subjects, so that each voxel within the group-level phase-phase grid  
651 contained a distribution of Z-scores. For each voxel on the group grid, one-sample T-tests were  
652 used to define significant deviations from zero ( $H_0$  distribution:  $\mu = 0$  and  $\sigma = \text{sample } \sigma$ ). The  
653 resultant significance map was FDR-corrected. For consistency, T-scores were standardized to Z-  
654 scores using the normal cumulative distribution function.

### 655 **Regression and visual response analyses**

656 Various multiple linear regression analyses (OLS), were employed to disentangle the different  
657 contributors to visual response dynamics and estimate sources of visual response variance.

658 In a first approach, for each respective animal, the global signal and visual predictor were either  
659 separately or simultaneously regressed. The signal from visually activated areas (binary mask of  
660 significant group-level activations from GLM-based analysis) and the global signal across all brain  
661 areas were then calculated for all subjects. These time series and the QPP correlation vector were  
662 collected across all trials ( $n = 24$  animals  $\times$  10 trials). The resultant distributions at each time point  
663 were analyzed and visualized as peri-event time traces, normalized to the 10s OFF period (Z-  
664 scoring procedure) prior to stimulation. Significant activations or de-activations at each time point  
665 were evaluated by one-sample T-tests ( $H_0$  distribution:  $\mu = 0$  and  $\sigma =$  sample  $\sigma$ ) and FDR-corrected  
666 for the number of evaluated time points [ $n=90s/(0.5s/TR)$ ] within each trial). Specifically, in  
667 these analyses, the purpose was not to directly compare the extent of statistical differences  
668 between various regression approaches, but rather to determine if there were significant  
669 increases or decreases in brain area time series and (particularly) QPP correlation vectors with  
670 regard to a zero-mean distribution. For visualisation, the QPP correlation vector was shown as  
671 mean Pearson correlation ( $\rho$ ) rather than Z-score unit.

672 In a second approach, differences between visual response means were evaluated for stratified  
673 stimulation trials (all animals and trials), in different regression analyses. One-way analysis of  
674 variance (ANOVA) tests were performed for each time point during stimulation and model p-  
675 values were FDR corrected for the number of evaluated time points [ $n=30s/(0.5s/TR)$ ]. Post-  
676 hoc tests were Bonferroni corrected.

677

678

679

680

681

682

## 683 **Acknowledgements**

684 We thank Alessandro Gozzi, Daniel Barragan, Daniele Marinazzo and Xin Yu for their valuable  
685 feedback. This work was supported by the interdisciplinary PhD grant (ID) BOF DOCPRO 2014  
686 (granted to M.V.) and further partially supported by funding received from: the European Union's  
687 Seventh Framework Programme (FP7/2007-2013; INMiND) (grant agreement 278850, granted to  
688 AVdL.), the molecular Imaging of Brain Pathophysiology (BRAINPATH) and the Marie Curie Actions-  
689 Industry-Academia Partnerships and Pathways (IAPP) program (grant agreement 612360, granted  
690 to A.VdL.), Flagship ERA-NET (FLAG-ERA) FUSIMICE (grant agreement G.0D7615N), stichting  
691 Alzheimer onderzoek (SAO-FRA) (grant agreement 13026, granted to A.VdL.), the Flemish Impulse  
692 funding for heavy scientific equipment (granted to A.VdL.), the Fund for Scientific Research  
693 Flanders (FWO) (grant agreements G.048917N, G.057615N and G.067515N), the National  
694 Institutes of Health (NIH) (grant agreements R01MH111416-01 and R01NS078095), the National  
695 Science Foundation (NSF) (grant agreement BCS INSPIRE 1533260), and the ISMRM Research  
696 Exchange Program (granted to M.E.B.). The computational resources and services used in this  
697 work were provided by the HPC core facility CalcUA of the Universiteit Antwerpen, the VSC  
698 (Flemish Supercomputer Center), funded by the Hercules Foundation and the Flemish  
699 Government – department EWI.”

## 700 **Competing interests**

701 The authors declare no competing interests.

702

## 703 **Authors' contributions**

704 M.E.B. designed research, performed experiments, designed analysis, performed analysis, wrote  
705 paper. J.B. designed analysis and contributed valuable discussion. A.B., A.K, and W-J. P.  
706 contributed valuable discussions. R.H., V.V. and J.V.A. provided experimental and analytical  
707 support. A.V.D.L., S.D.K., and M.V. designed research and analysis. G.A.K. designed research,  
708 designed analysis and wrote paper. S.D.K., M.V and G.A.K. contributed equally to this work.

## 709 References

- 710 Abbas, A., Belloy, M., Kashyap, A., Billings, J., Nezafati, M., Schumacher, E.H., Keilholz, S., 2019. Quasi-periodic patterns  
711 contribute to functional connectivity in the brain. *Neuroimage* 191, 193–204. doi:10.1016/j.neuroimage.2019.01.076
- 712 Abbas, A., Langley, J., Howell, L., Keilholz, S., 2016. Quasiperiodic patterns vary in frequency between anesthetized and awake  
713 monkeys, in: *Resting State Brain Connectivity Biennial Conference*. p. 14.
- 714 Abbas, A., Majeed, W., Thompson, G.J., Keilholz, S.D., 2016. Phase of quasiperiodic pattern predicts performance on vigilance  
715 task in humans. *Proc Int Soc Magn Reson Med* 1192.
- 716 Adamczak, J.M., Farr, T.D., Seehafer, J.U., Kalthoff, D., Hoehn, M., 2010. High field BOLD response to forepaw stimulation in the  
717 mouse. *Neuroimage* 51, 704–712. doi:10.1016/j.neuroimage.2010.02.083
- 718 Allen, E.A., Damaraju, E., Eichele, T., Wu, L., Calhoun, V.D., 2018. EEG Signatures of Dynamic Functional Network Connectivity  
719 States. *Brain Topogr.* 31, 101–116.
- 720 Allen, E.A., Damaraju, E., Plis, S.M., Erhardt, E.B., Eichele, T., Calhoun, V.D., 2014. Tracking whole-brain connectivity dynamics in  
721 the resting state. *Cereb. Cortex* 24, 663–676. doi:10.1093/cercor/bhs352
- 722 Bandettini, P.A., 2012. Twenty years of functional mri: The science and the stories. *Neuroimage* 62, 575–588.
- 723 Bär, K.J., De la Cruz, F., Schumann, A., Koehler, S., Sauer, H., Critchley, H., Wagner, G., 2016. Functional connectivity and network  
724 analysis of midbrain and brainstem nuclei. *Neuroimage* 134, 53–63. doi:10.1016/j.neuroimage.2016.03.071
- 725 Belloy, M.E., Naeyaert, M., Abbas, A., Shah, D., Vanreusel, V., Van Audekerke, J., Keilholz, S.D., Keliris, G.A., Van der Linden, A.,  
726 Verhoye, M., 2018a. Dynamic resting state fMRI analysis in mice reveals a set of Quasi-Periodic Patterns and illustrates  
727 their relationship with the global signal. *Neuroimage* 180, Part, 463–484. doi:10.1016/j.neuroimage.2018.01.075
- 728 Belloy, M.E., Shah, D., Abbas, A., Kashyap, A., Roßner, S., Van Der Linden, A., Keilholz, S.D., Keliris, G.A., Verhoye, M., 2018b.  
729 Quasi-Periodic Patterns of Neural Activity improve Classification of Alzheimer’s Disease in Mice. *Sci. Rep.* 8.  
730 doi:10.1038/s41598-018-28237-9
- 731 Billings, J., Keilholz, S., 2018. The Not - So - Global BOLD Signal. *Brain Connect.* 1–37. doi:10.1089/brain.2017.0517
- 732 Boly, M., Balteau, E., Schnakers, C., Degueldre, C., Moonen, G., Luxen, A., Phillips, C., Peigneux, P., 2007. Baseline brain activity  
733 fluctuations predict somatosensory perception in humans. *Proc Natl Acad Sci U S A.* 104, 12187–12192.
- 734 Carter, M.E., Yizhar, O., Chikahisa, S., Nguyen, H., Adamantidis, A., Nishino, S., Deisseroth, K., de Lecea, L., 2010. Tuning arousal  
735 with optogenetic modulation of locus coeruleus neurons. *Nat. Neurosci.* 13, 1526–1533. doi:10.1038/nn.2682.Tuning
- 736 Chang, C., Leopold, D.A., Schölvinck, M.L., Mandelkow, H., Picchioni, D., Liu, X., Ye, F.Q., Turchi, J.N., Duyn, J.H., 2016. Tracking  
737 brain arousal fluctuations with fMRI. *Proc. Natl. Acad. Sci. U. S. A.* 113, 4518–4523. doi:10.1073/pnas.1520613113
- 738 Deco, G., Jirsa, V.K., Mcintosh, A.R., 2011. Emerging concepts for the dynamical organization of resting-state activity in the brain.  
739 *Nat. Publ. Gr.* 12, 43–56. doi:10.1038/nrn2961
- 740 Drew, P.J., Duyn, J.H., Golanov, E., Kleinfeld, D., 2008. Finding coherence in spontaneous oscillations. *Nat. Neurosci.* 11, 991–3.  
741 doi:10.1038/nn0908-991
- 742 Drew, P.J., Shih, A.Y., Kleinfeld, D., 2011. Fluctuating and sensory-induced vasodynamics in rodent cortex extend arteriole  
743 capacity. *Proc. Natl. Acad. Sci. U. S. A.* 108, 8473–8478. doi:10.1073/pnas.1100428108
- 744 Esterman, M., Noonan, S.K., Rosenberg, M., Degutis, J., 2013. In the Zone or Zoning Out ? Tracking Behavioral and Neural  
745 Fluctuations During Sustained Attention. *Cereb. Cortex* Novemb. 23, 2712–2723. doi:10.1093/cercor/bhs261
- 746 Fox, M.D., Raichle, M.E., 2007. Spontaneous fluctuations in brain activity observed with functional magnetic resonance imaging.  
747 *Nat Rev Neurosci.* 8, 700–711.

- 748 Fox, M.D., Snyder, A.Z., Vincent, J.L., Raichle, M.E., 2007. Intrinsic Fluctuations within Cortical Systems Account for Intertrial  
749 Variability in Human Behavior. *Neuron* 56, 171–184. doi:10.1016/j.neuron.2007.08.023
- 750 Fox, M.D., Snyder, A.Z., Zacks, J.M., Raichle, M.E., 2006. Coherent spontaneous activity accounts for trial-to-trial variability in  
751 human evoked brain responses. *Nat. Neurosci.* 9, 23–5. doi:10.1038/nn1616
- 752 Fox, M.D., Zhang, D., Snyder, A.Z., Raichle, M.E., Anticevic, A., Cole, M.W., Repovs, G., Murray, J.D., Brumbaugh, M.S., Winkler,  
753 A.M., Savic, A., Krystal, J.H., Pearlson, G.D., David, C., Baldassarre, A., Ramsey, L., Hacker, C.L., Callejas, A., Astafiev, S. V.,  
754 Metcalf, N. V., Zinn, K., Rengachary, J., Snyder, A.Z., Carter, A.R., Shulman, G.L., Corbetta, M., Sadeh, N., Spielberg, J.M.,  
755 Warren, S.L., Miller, G.A., Heller, W., Fox, M.D., Zhang, D., Snyder, A.Z., Raichle, M.E., 2009. The Global Signal and  
756 Observed Anticorrelated Resting State Brain Networks. doi:10.1152/jn.90777.2008
- 757 Fransson, P., 2006. How default is the default mode of brain function? Further evidence from intrinsic BOLD signal fluctuations.  
758 *Neuropsychologia* 44, 2836–2845. doi:10.1016/j.neuropsychologia.2006.06.017
- 759 Gonzalez-Castillo, J., Hoy, C.W., Handwerker, D. a., Robinson, M.E., Buchanan, L.C., Saad, Z.S., Bandettini, P. a., 2015. Tracking  
760 ongoing cognition in individuals using brief, whole-brain functional connectivity patterns. *Proc. Natl. Acad. Sci.* 112, 8762–  
761 8767. doi:10.1073/pnas.1501242112
- 762 Grandjean, J., Corcoba, A., Kahn, M.C., Upton, A.L., Deneris, E.S., Seifritz, E., Helmchen, F., Mann, E.O., Rudin, M., Saab, B.J.,  
763 2019. A brain-wide functional map of the serotonergic responses to acute stress and fluoxetine. *Nat. Commun.* 10.  
764 doi:10.1038/s41467-018-08256-w
- 765 Grandjean, J., Schroeter, A., Batata, I., Rudin, M., 2014. Optimization of anesthesia protocol for resting-state fMRI in mice based  
766 on differential effects of anesthetics on functional connectivity patterns. *Neuroimage* 102, 838–847.  
767 doi:10.1016/j.neuroimage.2014.08.043
- 768 Grandjean, J., Zerbi, V., Balsters, J., Wenderoth, N., 2017. The structural basis of large-scale functional connectivity in the mouse.  
769 *J. Neurosci.* 37, 8092–8101. doi:10.1523/JNEUROSCI.0438-17.2017
- 770 Greicius, M.D., Krasnow, B., Reiss, A.L., Menon, V., 2003. Functional connectivity in the resting brain: a network analysis of the  
771 default mode hypothesis. *Proc. Natl. Acad. Sci. U. S. A.* 100, 253–8. doi:10.1073/pnas.0135058100
- 772 Grooms, J.K., Thompson, G.J., Pan, W.-J., Billings, J., Schumacher, E.H., Epstein, C.M., Keilholz, S.D., 2017. Infralow EEG and  
773 dynamic resting state network activity. *Brain Connect.* 7, 265–280. doi:10.1089/brain.2017.0492
- 774 Gutierrez-Barragan, D., Basson, M.A., Panzeri, S., Gozzi, A., 2018. Oscillatory brain states govern spontaneous fMRI network  
775 dynamics. *bioRxiv* 1–53.
- 776 He, B.J., 2013. Spontaneous and task-evoked brain activity negatively interact. *J. neurosci* 33, 4672–4682.  
777 doi:10.1523/JNEUROSCI.2922-12.2013.Spontaneous
- 778 He, B.J., Raichle, M.E., 2009. The fMRI signal, slow cortical potential and consciousness. *Trends Cogn Sci.* 13, 302–309.  
779 doi:10.1016/j.tics.2009.04.004.The
- 780 Helps, S.K., Broyd, S.J., James, C.J., Karl, A., S., E.J., Sonuga-Barke, 2009. The Attenuation of Very Low Frequency Brain  
781 Oscillations in Transitions from a Rest State to Active Attention. *J. Psychophysiol.* 23, 191–198.
- 782 Hinz, R., Peeters, L.M., Shah, D., Missault, S., Belloy, M., Vanreusel, V., Malekzadeh, M., Verhoye, M., Van der Linden, A., Keliris,  
783 G.A., 2019. Bottom-up sensory processing can induce negative BOLD responses and reduce functional connectivity in  
784 nodes of the default mode-like network in rats, *NeuroImage*. Elsevier Inc. doi:10.1016/j.neuroimage.2019.04.065
- 785 Horowitz, S.G., Fukunaga, M., de Zwart, J. a, van Gelderen, P., Fulton, S.C., Balkin, T.J., Duyn, J.H., 2008. Low frequency BOLD  
786 fluctuations during resting wakefulness and light sleep: a simultaneous EEG-fMRI study. *Hum. Brain Mapp.* 29, 671–82.

- 787 doi:10.1002/hbm.20428
- 788 Joshi, S., Li, Y., Kalwani, R.M., Gold, J.I., 2016. Relationships between Pupil Diameter and Neuronal Activity in the Locus  
789 Coeruleus, Colliculi, and Cingulate Cortex. *Neuron* 89, 221–234. doi:10.1016/j.neuron.2015.11.028
- 790 Keilholz, S., Caballero-Gaudes, C., Bandettini, P., Deco, G., Calhoun, V., 2017. Time-resolved resting state fMRI analysis: current  
791 status, challenges, and new directions. *Brain Connect.* 8, 465–481.
- 792 Keilholz, S.D., 2014. The neural basis of time-varying resting-state functional connectivity. *Brain Connect.* 4, 769–79.  
793 doi:10.1089/brain.2014.0250
- 794 Kucyi, A., Esterman, M., Riley, C.S., Valera, E.M., 2016. Spontaneous default network activity reflects behavioral variability  
795 independent of mind-wandering. *Proc. Natl. Acad. Sci. U. S. A.* 113, 13899–13904. doi:10.1073/pnas.1611743113
- 796 Kucyi, A., Hove, M.J., Esterman, M., Hutchison, R.M., Valera, E.M., 2017. Dynamic Brain Network Correlates of Spontaneous  
797 Fluctuations in Attention. *Cereb. Cortex* 27, 1831–1840. doi:10.1093/cercor/bhw029
- 798 Kucyi, A., Tambini, A., Sadaghiani, S., Keilholz, S., Cohen, J.R., 2018. Spontaneous cognitive processes and the behavioral  
799 validation of time-varying brain connectivity. *Netw. Neurosci.*
- 800 Lakatos, P., Barczak, A., Neymotin, S.A., McGinnis, T., Ross, D., Javitt, D.C., Connell, M.N.O., 2016. Global dynamics of selective  
801 attention and its lapses in primary auditory cortex. *Nat. Neurosci.* 19. doi:10.1038/nn.4386
- 802 Laumann, T., Snyder, A., Mitra, A., Gordon, E., Gratton, C., Adeyemo, B., Gilmore, A., Nelson, S., Berg, J., Greene, D., McCarthy,  
803 J., Tagliazucchi, E., Laufs, H., Schlaggar, B., Dosenbach, N., Petersen, S., 2017. On the Stability of BOLD fMRI Correlations.  
804 *Cereb. Cortex* 27, 4719–4732.
- 805 Lee, S., Dan, Y., 2012. Neuromodulation of Brain States. *Neuron* 76, 209–222. doi:10.1016/j.neuron.2012.09.012
- 806 Liska, A., Galbusera, A., Schwarz, A.J., Gozzi, A., 2015. Functional connectivity hubs of the mouse brain. *Neuroimage* 115, 281–  
807 291. doi:10.1016/j.neuroimage.2015.04.033
- 808 Liu, T.T., Nalci, A., Falahpour, M., 2017. The global signal in fMRI: Nuisance or Information? *Neuroimage* 150, 213–229.  
809 doi:10.1016/j.neuroimage.2017.02.036
- 810 Liu, X., Duyn, J.H., 2013. Time-varying functional network information extracted from brief instances of spontaneous brain  
811 activity. *Proc. Natl. Acad. Sci.* 110, 4392–4397. doi:10.1073/pnas.1216856110
- 812 Liu, X., Zwart, J.A. De, Schölvink, M.L., Chang, C., Ye, F.Q., Leopold, D.A., Duyn, J.H., 2018. Subcortical evidence for a  
813 contribution of arousal to fMRI studies of brain activity. *Nat. Commun.* 9, 1–10. doi:10.1038/s41467-017-02815-3
- 814 Lynn, J., Kong, D., Chia, T.T.Y., Tandi, J., Yeo, B.T.T., Chee, M.W.L., 2015. Co-activated yet disconnected - Neural correlates of eye  
815 closures when trying to stay awake. *Neuroimage* 118, 553–562. doi:10.1016/j.neuroimage.2015.03.085
- 816 Majeed, W., Magnuson, M., Hasenkamp, W., Schwab, H., Schumacher, H.E., Barsalou, L., Keilholz, S.D., 2011. Spatiotemporal  
817 dynamics of low frequency BOLD fluctuations in rats and humans. *Neuroimage* 54, 1140–1150.  
818 doi:10.1016/j.neuroimage.2010.08.030
- 819 Mcginley, M.J., Vinck, M., Reimer, J., Batista-brito, R., Zagha, E., Cadwell, C.R., Tolia, A.S., Cardin, J.A., McCormick, D.A., 2015.  
820 Waking State: Rapid Variations Modulate Neural and Behavioral Responses. *Neuron* 87, 1143–1161.  
821 doi:10.1016/j.neuron.2015.09.012
- 822 Murphy, K., Fox, M.D., 2016. Towards a Consensus Regarding Global Signal Regression for Resting State Functional Connectivity  
823 MRI. *Neuroimage* 154, 169–173. doi:10.1016/j.neuroimage.2016.11.052
- 824 Nalci, A., Rao, B.D., Liu, T.T., 2017. Sparse Estimation of Quasi-periodic Spatiotemporal Components in Resting-State fMRI 15–  
825 17.



- 826 Niranjan, A., Christie, I.N., Solomon, S.G., Wells, J.A., Lythgoe, M.F., 2016. NeuroImage fMRI mapping of the visual system in the  
827 mouse brain with interleaved snapshot GE-EPI. *Neuroimage* 139, 337–345. doi:10.1016/j.neuroimage.2016.06.015
- 828 Northoff, G., Qin, P., Nakao, T., 2010. Rest-stimulus interaction in the brain: a review. *Trends Neurosci.* 33, 277–284.  
829 doi:10.1016/j.tins.2010.02.006
- 830 Oh, S.W., Harris, J.A., Ng, L., Winslow, B., Cain, N., Mihalas, S., Wang, Q., Lau, C., Kuan, L., Henry, A.M., Mortrud, M.T., Ouellette,  
831 B., Nguyen, T.N., Sorensen, S.A., Slaughterbeck, C.R., Wakeman, W., Li, Y., Feng, D., Ho, A., Nicholas, E., Hirokawa, K.E.,  
832 Bohn, P., Joines, K.M., Peng, H., Hawrylycz, M.J., Phillips, J.W., Hohmann, J.G., Wohnoutka, P., Gerfen, C.R., Koch, C.,  
833 Bernard, A., Dang, C., Jones, A.R., Zeng, H., 2014. A mesoscale connectome of the mouse brain. *Nature* 0.  
834 doi:10.1038/nature13186
- 835 Palva, J.M., Palva, S., 2012. Infra-slow fluctuations in electrophysiological recordings, blood-oxygenation-level-dependent  
836 signals, and psychophysical time series. *Neuroimage* 62, 2201–2211. doi:10.1016/j.neuroimage.2012.02.060
- 837 Pan, W.J., Thompson, G.J., Magnuson, M.E., Jaeger, D., Keilholz, S., 2013. Infralow LFP correlates to resting-state fMRI BOLD  
838 signals. *Neuroimage* 74, 288–297. doi:10.1016/j.neuroimage.2013.02.035
- 839 PISAURO, M.A., BENUCCI, A., CARANDINI, X.M., 2016. Local and global contributions to hemodynamic activity in mouse cortex. *J.*  
840 *Neurophysiol.* 115, 2931–2936. doi:10.1152/jn.00125.2016
- 841 PISAURO, M.A., DHURV, N.T., CARANDINI, M., BENUCCI, A., 2013. Fast hemodynamic responses in the visual cortex of the awake  
842 mouse. *J. Neurosci.* 33, 18343–18351. doi:10.1523/JNEUROSCI.2130-13.2013
- 843 Raichle, M.E., 2010. Two views of brain function. *Trends Cogn. Sci.* 14, 180–190. doi:10.1016/j.tics.2010.01.008
- 844 Reimann, H.M., Todiras, M., Hodge, R., Huelnhagen, T., Millward, M., Turner, R., Seeliger, E., Bader, M., 2018. Max Delbrück  
845 Center for Molecular Medicine in the Helmholtz Association. *Neuroimage*. doi:10.1016/j.neuroimage.2018.02.002
- 846 Reimer, J., Froudarakis, E., Cadwell, C.R., Yatsenko, D., Denfield, G.H., Tolias, A.S., 2014. Pupil Fluctuations Track Fast Switching  
847 of Cortical States during Quiet Wakefulness. *Neuron* 84, 355–362. doi:10.1016/j.neuron.2014.09.033
- 848 Sadaghiani, S., Hesselmann, G., Kleinschmidt, A., 2009. Distributed and Antagonistic Contributions of Ongoing Activity  
849 Fluctuations to Auditory Stimulus Detection. *J. Neurosci.* 29, 13410–13417. doi:10.1523/JNEUROSCI.2592-09.2009
- 850 Safaai, H., Neves, R., Eschenko, O., Logothetis, N.K., Panzeri, S., 2015. Modeling the effect of locus coeruleus firing on cortical  
851 state dynamics and single-trial sensory processing. *Proc. Natl. Acad. Sci. U. S. A.* 112, 12834–12839.  
852 doi:10.1073/pnas.1516539112
- 853 Sämann, P.G., Wehrle, R., Hoehn, D., Spormaker, V.I., Peters, H., Tully, C., Holsboer, F., Gzisch, M., 2011. Development of the  
854 Brain's Default Mode Network from Wakefulness to Slow Wave Sleep. *Cereb. Cortex* 21, 2082–2093.  
855 doi:10.1093/cercor/bhq295
- 856 Schlegel, F., Schroeter, A., Rudin, M., 2015. The hemodynamic response to somatosensory stimulation in mice depends on the  
857 anesthetic used: Implications on analysis of mouse fMRI data. *Neuroimage* 116, 40–49.  
858 doi:10.1016/j.neuroimage.2015.05.013
- 859 Schölvinck, M.L., Maier, A., Ye, F.Q., Duyn, J.H., Leopold, D.A., 2010. Neural basis of global resting-state fMRI activity. *Proc. Natl.*  
860 *Acad. Sci. U. S. A.* 107, 10238–43. doi:10.1073/pnas.0913110107
- 861 Schölvinck, M.L., Saleem, A.B., Benucci, X.A., Harris, X.K.D., Carandini, X.M., 2015. Cortical State Determines Global Variability  
862 and Correlations in Visual Cortex. *J. Neurosci.* 35, 170–178. doi:10.1523/JNEUROSCI.4994-13.2015
- 863 Schroeder, C.E., Lakatos, P., 2010. Low-frequency neuronal oscillations as instruments of sensory selection. *Trends Neurosci* 32,  
864 1–16. doi:10.1016/j.tins.2008.09.012.Low-frequency

- 865 Schroeter, A., Grandjean, J., Schlegel, F., Saab, B.J., Rudin, M., 2016. Contributions of structural connectivity and cerebrovascular  
866 parameters to functional magnetic resonance imaging signals in mice at rest and during sensory paw stimulation. *J.*  
867 *Cereb. Blood Flow Metab.* 0271678X16666292. doi:10.1177/0271678X16666292
- 868 Schroeter, A., Schlegel, F., Seuwen, A., Grandjean, J., Rudin, M., 2014. Specificity of stimulus-evoked fMRI responses in the  
869 mouse: The influence of systemic physiological changes associated with innocuous stimulation under four different  
870 anesthetics. *Neuroimage* 94, 372–384. doi:10.1016/j.neuroimage.2014.01.046
- 871 Shine, J.M., Koyejo, O., Poldrack, R.A., 2016. Temporal metastates are associated with differential patterns of time-resolved  
872 connectivity, network topology, and attention. *Proc Natl Acad Sci U S A.* 113. doi:10.1073/pnas.1604898113
- 873 Tagliazucchi, E., Laufs, H., 2014. Decoding Wakefulness Levels from Typical fMRI Resting-State Data Reveals Reliable Drifts  
874 between Wakefulness and Sleep. *Neuron* 82, 695–708. doi:10.1016/j.neuron.2014.03.020
- 875 Thompson, G.J., Magnuson, M.E., Merritt, M.D., Schwarb, H., Pan, W.J., Mckinley, A., Tripp, L.D., Schumacher, E.H., Keilholz,  
876 S.D., 2013. Short-time windows of correlation between large-scale functional brain networks predict vigilance  
877 intraindividually and interindividually. *Hum. Brain Mapp.* 34, 3280–3298. doi:10.1002/hbm.22140
- 878 Thompson, G.J., Pan, W.-J., Billings, J.C.W., Grooms, J.K., Shakil, S., Jaeger, D., Keilholz, S.D., 2014. Phase-amplitude coupling and  
879 infraslow (<1 Hz) frequencies in the rat brain: relationship to resting state fMRI. *Front. Integr. Neurosci.* 8, 41.  
880 doi:10.3389/fnint.2014.00041
- 881 Turchi, J., Chang, C., Ye, F.Q., Monosov, I.E., Duyn, J.H., Leopold, D.A., Turchi, J., Chang, C., Ye, F.Q., Russ, B.E., Yu, D.K., Cortes,  
882 C.R., Monosov, I.E., 2018. The Basal Forebrain Regulates Global Resting-State fMRI Fluctuations. *Neuron* 1–13.  
883 doi:10.1016/j.neuron.2018.01.032
- 884 Wang, C., Ong, J.L., Patanaik, A., Zhou, J., Chee, M.W.L., 2016. Spontaneous eyelid closures link vigilance fluctuation with fMRI  
885 dynamic connectivity states. *Proc. Natl. Acad. Sci. U. S. A.* 113, 2–7. doi:10.1073/pnas.1523980113
- 886 Weissman, D.H., Roberts, K.C., Visscher, K.M., Woldorff, M.G., 2006. The neural bases of momentary lapses in attention. *Nat.*  
887 *Neurosci.* 9, 971–978. doi:10.1038/nn1727
- 888 Wen, H., Liu, Z., 2016. Broadband Electrophysiological Dynamics Contribute to Global Resting-State fMRI Signal. *J. Neurosci.* 36,  
889 6030–6040. doi:10.1523/JNEUROSCI.0187-16.2016
- 890 Wong, C.W., DeYoung, P.N., Liu, T.T., 2016. Differences in the resting-state fMRI global signal amplitude between the eyes open  
891 and eyes closed states are related to changes in EEG vigilance. *Neuroimage* 124, 24–31.  
892 doi:10.1016/j.neuroimage.2015.08.053
- 893 Wong, C.W., Olafsson, V., Tal, O., Liu, T.T., 2013. The amplitude of the resting-state fMRI global signal is related to EEG vigilance  
894 measures. *Neuroimage* 83, 983–990. doi:10.1016/j.neuroimage.2013.07.057
- 895 Wong, C.W., Olafsson, V., Tal, O., Liu, T.T., 2012. Anti-correlated networks, global signal regression, and the effects of caffeine in  
896 resting-state functional MRI. *Neuroimage* 63, 356–364. doi:10.1016/j.neuroimage.2012.06.035
- 897 Yeo, B.T.T., Tandi, J., Chee, M.W.L., 2015. NeuroImage Functional connectivity during rested wakefulness predicts vulnerability  
898 to sleep deprivation. *Neuroimage* 111, 147–158. doi:10.1016/j.neuroimage.2015.02.018
- 899 Yousefi, B., Shin, J., Schumacher, E.H., Keilholz, S.D., 2018. Quasi-periodic patterns of intrinsic brain activity in individuals and  
900 their relationship to global signal. *Neuroimage* 167, 297–308. doi:10.1016/j.neuroimage.2017.11.043
- 901 Zerbi, V., Grandjean, J., Rudin, M., Wenderoth, N., 2015. Mapping the mouse brain with rs-fMRI: An optimized pipeline for  
902 functional network identification. *Neuroimage* 123, 11–21. doi:10.1016/j.neuroimage.2015.07.090
- 903

904 **Video 1.** QPP1 temporal evolution displayed per TR (0.5s) over a duration of 3s. Maps display Z-  
905 scores [n = 71 scans; Z-test with H0 through randomized image averaging (n=1000), FDR  $p < 10^{-7}$ ,  
906 cluster-correction 4 voxels].

907  
908 **Video 2.** QPP2 temporal evolution displayed per TR (0.5s) over a duration of 9s. Maps display Z-  
909 scores [n = 71 scans; Z-test with H0 through randomized image averaging (n=1000), FDR  $p < 10^{-7}$ ,  
910 cluster-correction 4 voxels].

911  
912 **Video 3.** QPP3 temporal evolution displayed per TR (0.5s) over a duration of 9s. Maps display Z-  
913 scores [n = 71 scans; Z-test with H0 through randomized image averaging (n=1000), FDR  $p < 10^{-7}$ ,  
914 cluster-correction 4 voxels].

915  
916 **Video 4.** Global signal temporal evolution displayed per TR (0.5s) over a duration of 9s (global  
917 signal peak occurs at 2s; image range [-2:7s] was chosen through cross-correlation of the global  
918 signal with QPP1-3 time series). Maps display Z-scores [n = 71 scans; Z-test with H0 through  
919 randomized image averaging (n=1000), FDR  $p < 10^{-7}$ , cluster-correction 4 voxels].

920
